# Supplementary material for: Human Pluripotent Stem Cell-Derived Neurons Are Functionally Mature In Vitro and Integrate into the Mouse Striatum Following Transplantation
Source: PubMed Central journal article supplement (PMC7253531; doi:10.1007/s12035-020-01907-4), 2020-04-30
Supplement: 12035_2020_1907_MOESM1_ESM.pdf [file 12035_2020_1907_MOESM1_ESM.pdf]

## Supplementary material

### Human Pluripotent Stem Cell-derived Neurons are Functionally Mature *in vitro* and Integrate into the Mouse Striatum *in vivo*

**Andrea Comella-Bolla**<sup>1,2,3,4,5</sup> · **Javier G. Orlandi**<sup>6,7,8</sup> · **Andrés Miguez**<sup>1,2,3,4,5</sup> · **Marco Straccia**<sup>1,2,3,4,5</sup> · **María García-Bravo**<sup>9,10</sup> · **Georgina Bombau**<sup>1,2,3,4,5</sup> · **Mireia Galofré**<sup>1,2,3,4,5</sup> · **Phil Sanders**<sup>1,2,3,4,5</sup> · **Jordi Carrere**<sup>1,2,3,4,5</sup> · **José Carlos Segovia**<sup>9,10</sup> · **Joan Blasi**<sup>11</sup> · **Nicholas D. Allen**<sup>12</sup> · **Jordi Alberch**<sup>2,3,4,5,6</sup> · **Jordi Soriano**<sup>7,13</sup> · **Josep M. Canals**<sup>1,2,3,4,5</sup>.

<sup>1</sup>Laboratory of Stem Cells and Regenerative Medicine, Department of Biomedicine, Faculty of Medicine and Health Science, University of Barcelona, Barcelona, Spain.

<sup>2</sup>Production and validation center of advanced therapies (Creatio), Faculty of Medicine and Health Science, University of Barcelona, Spain.

<sup>3</sup>Institute of Neurosciences, University of Barcelona, Barcelona, Spain.

<sup>4</sup>Networked Biomedical Research Centre for Neurodegenerative Disorders (CIBERNED), Spain.

<sup>5</sup>August Pi i Sunyer Biomedical Research Institute (IDIBAPS), Barcelona, Spain

<sup>6</sup>Pathophysiology of Neurodegenerative Disease. Laboratory, Department of Biomedicine, Faculty of Medicine and Health Science, University of Barcelona, Barcelona, Spain.

<sup>7</sup>Departament de Física de la Matèria Condensada, University of Barcelona, Barcelona, Spain.

<sup>8</sup>Department of Physics and Astronomy, University of Calgary, Calgary, Canada.

<sup>9</sup>Differentiation and Cytometry Unit. Division of Hematopoietic Innovative Therapies, Centro de Investigaciones Energéticas Medioambientales y Tecnológicas and Centro de Investigación Biomédica en Red de Enfermedades Raras (CIEMAT/CIBERER). Madrid. Spain.

<sup>10</sup>Advanced Therapies Unit, Instituto de Investigación Sanitaria Fundación Jiménez Díaz (IIS-FJD, UAM), Madrid, Spain.

<sup>11</sup>Laboratory of Cellular and Molecular Neurobiology, Department Pathology and Experimental Therapeutics, Faculty of Medicine and Health Science, Biomedical Research Institute of Bellvitge (IDIBELL); University of Barcelona, Barcelona, Spain.

<sup>12</sup>Cardiff Repair Group, School of Biosciences and medicine, Cardiff University, Cardiff, Wales, UK.

<sup>13</sup>Institute of Complex Systems (UBICS), University of Barcelona, Barcelona, Spain.

**Table S1** Table of correspondence of human gene names with human protein names

| Gene    | Protein name                                                                                                    | Protein symbol |
|---------|-----------------------------------------------------------------------------------------------------------------|----------------|
| ACTB    | Actin, cytoplasmic 1/ Beta-actin                                                                                | Actine         |
| ADAM10  | Disintegrin and metalloproteinase domain-containing protein 10                                                  | ADAM 10        |
| AMPH    | Amphiphysin                                                                                                     | AMPH           |
| BDNF    | Brain-derived neurotrophic factor                                                                               | Bdnf           |
| BIN1    | Myc box-dependent-interacting protein 1                                                                         | BIN1           |
| CACNA1A | Voltage-dependent P/Q-type calcium channel subunit alpha-1B                                                     | Cav2.1         |
| CACNA1B | Voltage-dependent P/Q-type calcium channel subunit alpha-1A                                                     | Cav2.2         |
| CACNA1C | Voltage-dependent L-type calcium channel subunit alpha-1C                                                       | CaV1.2         |
| CACNA1H | Voltage-dependent T-type calcium channel subunit alpha-1H                                                       | Cav3.2         |
| CACNA1S | Voltage-dependent L-type calcium channel subunit alpha-1S                                                       | Cav1.1         |
| CACNB1  | Voltage-dependent L-type calcium channel subunit beta-1                                                         | CAB1           |
| CACNB2  | Voltage-dependent L-type calcium channel subunit beta-2                                                         | CAB2           |
| CACNB3  | Voltage-dependent L-type calcium channel subunit beta-3                                                         | CAB3           |
| CACNB4  | Voltage-dependent L-type calcium channel subunit beta-4                                                         | CAB4           |
| CACNG2  | Voltage-dependent calcium channel gamma-2 subunit/ Transmembrane AMPAR regulatory protein gamma-2               | TARP gamma-2   |
| CAMK1G  | calcium/calmodulin-dependent protein kinase IG                                                                  | CaMKIG         |
| CAMK2A  | calcium/calmodulin-dependent protein kinase II alpha                                                            | CAMKA          |
| CAMK4   | calcium/calmodulin-dependent protein kinase IV                                                                  | CAMK4          |
| CASK    | Peripheral plasma membrane protein CASK                                                                         | CASK           |
| CLCA1   | Chloride channel accessory 1                                                                                    | hCaCC-1        |
| CLCN1   | Voltage-sensitive Chloride channel protein 1                                                                    | CIC-1          |
| CLCN2   | Voltage-sensitive Chloride channel protein 2                                                                    | CIC-2          |
| CLCN5   | Voltage-sensitive Chloride channel protein 5                                                                    | CIC-5          |
| CLCN6   | Voltage-sensitive Chloride channel protein 6                                                                    | CIC-6          |
| CLCN7   | Voltage-sensitive Chloride channel protein 7                                                                    | CIC-7          |
| CLIC1   | Chloride intracellular channel 1                                                                                | NCC27          |
| CLIC2   | Chloride intracellular channel 2                                                                                | XAP121         |
| CREB1   | cAMP responsive element binding protein 1                                                                       | CREB           |
| DLG1    | Discs large homolog 1                                                                                           | SAP-97         |
| DLG2    | Discs large homolog 2                                                                                           | PSD-93         |
| DLG3    | Discs large homolog 3                                                                                           | SAP102         |
| DLG4    | Discs large homolog 4                                                                                           | PSD95          |
| DRD1    | Dopamine receptor D1                                                                                            | DRD1A          |
| DRD2    | Dopamine receptor D2                                                                                            | D2DR           |
| DRD3    | Dopamine receptor D3                                                                                            | D3DR           |
| EIF2B1  | Translation initiation factor eIF-2B subunit alpha/ Eukaryotic translation initiation factor 2B subunit 1 alpha | EIF2BA         |
| GABRA1  | gamma-aminobutyric acid (GABA) A receptor alpha 1                                                               | GABRalfa1      |
| GABRA2  | GABA (A) receptor alpha 2                                                                                       | GABRalfa2      |
| GABRB1  | GABA (A) receptor beta 1                                                                                        | GABR beta1     |
| GABRB2  | GABA (A) receptor beta 2                                                                                        | GABR beta2     |
| GABRD   | GABA (A) receptor delta                                                                                         | GABR delta     |
| GABRE   | GABA (A) receptor epsilon                                                                                       | GABR epsilon   |
| GABRG1  | GABA (A) receptor gamma 1                                                                                       | GABR gamma1    |
| GABRG2  | GABA (A) receptor gamma 2                                                                                       | GABR gamma2    |
| GABRP   | GABA (A) receptor pi                                                                                            | GABR pi        |
| GABRQ   | GABA (A) receptor theta                                                                                         | GABR theta     |
| GAP43   | Neuromodulin                                                                                                    | GAP43          |
| GLRA1   | glycine receptor alpha 1                                                                                        | GLR alfa1      |
| GLRA2   | glycine receptor alpha 2                                                                                        | GLR alfa2      |
| GLRA3   | glycine receptor alpha 3                                                                                        | GLR alfa3      |

| Gene   | Protein name                                                                                                     | Protein symbol      |
|--------|------------------------------------------------------------------------------------------------------------------|---------------------|
| GRIA1  | Glutamate receptor ionotropic, AMPA 1                                                                            | GluR1/GluA1         |
| GRIA2  | Glutamate receptor ionotropic, AMPA 2                                                                            | GluR2/GluA2         |
| GRIA3  | Glutamate receptor ionotropic, AMPA 3                                                                            | GluR3/GluA3         |
| GRIA4  | Glutamate receptor ionotropic, AMPA 4                                                                            | GluR4/GluA4         |
| GRIK1  | Glutamate receptor ionotropic, kainate 1                                                                         | EAA3/GLUR5/GluK1    |
| GRIK3  | Glutamate receptor ionotropic, kainate 3                                                                         | EAA5/GLUR7/GluK3    |
| GRIK4  | Glutamate receptor ionotropic, kainate 4                                                                         | EAA1/GRIK/GluK4     |
| GRIK5  | Glutamate receptor ionotropic, kainate 5                                                                         | EAA2/GRIK2/GluK5    |
| GRIN1  | Glutamate receptor ionotropic, N-methyl D-aspartate (NMDA) 1                                                     | GluN1/NMDAR1/NR1    |
| GRIN2A | Glutamate receptor ionotropic, NMDA 2A                                                                           | GluN2A/NMDAR2A/NR2A |
| GRIN2B | Glutamate receptor ionotropic, NMDA 2B                                                                           | GluN2B/NMDAR2B/NR2B |
| GRIN2C | Glutamate receptor ionotropic, NMDA 2D                                                                           | GluN2C/NMDAR2C/NR2C |
| GRIN2D | Glutamate receptor ionotropic, NMDA 2C                                                                           | GluN2D/NMDAR2D/NR2D |
| GRIN3A | Glutamate receptor ionotropic, NMDA 3A                                                                           | GluN3A/NMDAR3A/NR3A |
| GRIN3B | Glutamate receptor ionotropic, NMDA 3A                                                                           | GluN3B/NMDAR3B/NR3B |
| GRINA  | Glutamate receptor ionotropic, NMDA -associated protein 1                                                        | NMDARA1/TMBIM3      |
| HPRT1  | hypoxanthine phosphoribosyltransferase 1;hCG15412 Celera Annotation                                              | HPRT                |
| HTR1B  | 5-hydroxytryptamine (serotonin) receptor 1B                                                                      | 5-HT1B              |
| HTR2A  | 5-hydroxytryptamine (serotonin) receptor 2A                                                                      | 5-HT2A              |
| HTR3A  | 5-hydroxytryptamine (serotonin) receptor 3A                                                                      | 5-HT3A              |
| HTR3B  | 5-hydroxytryptamine (serotonin) receptor 3B                                                                      | 5-HT3B              |
| KCNA1  | Potassium voltage-gated channel (shaker-related) subfamily A member 1                                            | Kv1.1               |
| KCNA10 | Potassium voltage-gated channel (shaker-related) subfamily A member 10                                           | Kv1.8               |
| KCNA2  | Potassium voltage-gated channel (shaker-related) subfamily A member 2                                            | KV1.2               |
| KCNA3  | Potassium voltage-gated channel (shaker-related) subfamily A member 3                                            | KV1.3               |
| KCNA4  | Potassium voltage-gated channel (shaker-related) subfamily A member 4                                            | KV1.4               |
| KCNA5  | Potassium voltage-gated channel (shaker-related) subfamily A member 5                                            | KV1.5               |
| KCNAB1 | Potassium voltage-gated channel subunit beta-1                                                                   | Kvb1.3              |
| KCNB1  | Potassium voltage-gated channel (Shab-related) subfamily B member 1                                              | KV2.1               |
| KCNC1  | Potassium voltage-gated channel (Shaw-related) subfamily C member 1                                              | KV3.1               |
| KCNC4  | Potassium voltage-gated channel (Shaw-related) subfamily C member 4                                              | KV3.4               |
| KCND1  | Potassium voltage-gated channel (Shal-related) subfamily D member 1                                              | KV4.1               |
| KCND2  | Potassium voltage-gated channel (Shal-related) subfamily D member 2                                              | KV4.2               |
| KCNE1  | Potassium voltage-gated channel (Isk-related family) subfamily E member 1                                        | Mink                |
| KCNF1  | Potassium voltage-gated channel subfamily F member 1                                                             | KV5.1/kH1           |
| KCNNG1 | Potassium voltage-gated channel subfamily G member 1                                                             | KV6.1/kH2           |
| KCNH1  | Potassium voltage-gated channel (eag-related) subfamily H member 1                                               | Kv10.1              |
| KCNH2  | Potassium voltage-gated channel (eag-related) subfamily H member 2                                               | Kv11.1              |
| KCNJ1  | ATP-sensitive inward rectifier potassium channel 1/Potassium inwardly-rectifying channel subfamily J member 1    | KIR1.1/ROMK1        |
| KCNJ11 | ATP-sensitive inward rectifier potassium channel 11/ Potassium inwardly-rectifying channel subfamily J member 11 | KIR6.2              |
| KCNJ4  | Inward rectifier potassium channel 4                                                                             | Kir2.3/IRK-3        |
| KCNJ5  | G protein-activated inward rectifier potassium channel 4                                                         | Kir3.4/IRK-4        |
| KCNJ6  | G protein-activated inward rectifier potassium channel 2                                                         | Kir3.2/KATP-2       |
| KCNK10 | Potassium channel subfamily K member 10/ Outward rectifying potassium channel protein TREK-2                     | K2p10.1/TREK2       |
| KCNK2  | Potassium channel subfamily K member 2/ Outward rectifying potassium channel protein TREK-1                      | K2p2.1/TREK1        |
| KCNK3  | Potassium channel subfamily K member 3/ Acid-sensitive potassium channel protein TASK-1                          | K2p3.1/TASK-1       |
| KCNK4  | Potassium channel subfamily K member 4/ TWIK-related arachidonic acid-stimulated potassium channel protei        | K2p4.1/TRAAK        |
| KCNK5  | Potassium channel subfamily K member 5 / Acid-sensitive potassium channel protein TASK-2                         | K2p5.1/TASK-2       |
| KCNK9  | Potassium channel subfamily K member 9/ Acid-sensitive potassium channel protein TASK-3                          | K2p9.1/TASK-3       |

| Gene    | Protein name                                                                            | Protein symbol           |
|---------|-----------------------------------------------------------------------------------------|--------------------------|
| KCNMB1  | Potassium large conductance calcium-activated channel subfamily M beta-1                | K(VCA)beta-1             |
| KCNN1   | Potassium intermediate/small conductance calcium-activated channel subfamily N member 1 | KCa2.1/SK1               |
| KCNN2   | Potassium small conductance calcium-activated channel subfamily N member 2              | KCa2.2/SK2               |
| KCNN3   | Potassium small conductance calcium-activated channel subfamily N member 3              | KCa2.3;/SK3              |
| KCNN4   | Potassium small conductance calcium-activated channel subfamily N member 4              | KCa3.1/SK4               |
| KCNQ1   | Potassium voltage-gated channel subfamily KQT member 1                                  | KvLQT1/Kv7.1             |
| KCNQ2   | Potassium voltage-gated channel subfamily KQT member 2                                  | KvLQT2/KV7.2             |
| KCNQ3   | Potassium voltage-gated channel subfamily KQT member 3                                  | KvLQT3/KV7.3             |
| KCNQ4   | Potassium voltage-gated channel subfamily KQT member 4                                  | KvLQT4/KV7.4             |
| KCNS1   | Potassium voltage-gated channel delayed-rectifier subfamily S member 1                  | KV9.1                    |
| KCNS2   | Potassium voltage-gated channel delayed-rectifier subfamily S member 2                  | KV9.2                    |
| KCNS3   | Potassium voltage-gated channel delayed-rectifier subfamily S member 3                  | KV9.3                    |
| NEUROD1 | Neuronal differentiation 1/ Class A basic helix-loop-helix protein 3                    | NEUROD/bHLHa3            |
| NTF3    | Neurotrophin 3/ Nerve growth factor 2                                                   | NT3/NGF2                 |
| NTRK1   | Neurotrophic tyrosine kinase receptor type 1                                            | TRK1                     |
| NTRK2   | Neurotrophic tyrosine kinase receptor type 2                                            | TRKB                     |
| NTRK3   | Neurotrophic tyrosine kinase receptor type 3                                            | TRKC                     |
| P2RX2   | P2X purinoceptor 2                                                                      | P2X2                     |
| P2RX4   | P2X purinoceptor 4                                                                      | P2X4                     |
| P2RX7   | P2X Purinergic receptor ligand-gated ion channel                                        | P2X7                     |
| P2RY1   | P2Y Purinergic receptor G-protein coupled                                               | P2Y1                     |
| PDE1B   | Calcium/calmodulin-dependent 3',5'-cyclic nucleotide phosphodiesterase 1B               | PDES1B                   |
| PPP1R9A | Neurabin-I/ Protein phosphatase 1 regulatory subunit 9A                                 | Neurabin-I/ NRB1         |
| PPP1R9B | Neurabin-2/ Spinophilin/ Protein phosphatase 1 regulatory subunit 9B                    | Neurabin-II/ Spinophilin |
| SCN1A   | Sodium voltage-gated channel type I alpha subunit                                       | Nav1.1                   |
| SCN2B   | Sodium voltage-gated channel type II beta subunit                                       | SCN2B                    |
| SCN3A   | Sodium voltage-gated channel type III alpha subunit                                     | Nav1.3                   |
| SCN4A   | Sodium voltage-gate channel type IV alpha subunit                                       | Nav1.4                   |
| SCN5A;- | Sodium voltage-gate channel type V alpha subunit                                        | Nav1.5                   |
| SCN7A   | Sodium voltage-gate channel type VII alpha subunit                                      | Nav2.1                   |
| SCN8A   | Sodium voltage-gate channel type VIII alpha subunit                                     | Nav1.6                   |
| SCN9A   | Sodium voltage-gate channel type IX alpha subunit                                       | Nav1.7                   |
| SLC12A1 | Solute carrier family 12 member 1/Na-K-Cl cotransporter 2                               | SLC12A1/NKCC2            |
| SLC12A2 | Solute carrier family 12 member 2/ Na-K-Cl cotransporter 1                              | SLC12A2/NKCC1            |
| SLC12A4 | Solute carrier family 12 member 4/ Electroneutral potassium-chloride cotransporter 1    | SLC12A4/KCC1             |
| SLC12A5 | Solute carrier family 12 member 5/ Electroneutral potassium-chloride cotransporter 2    | SLC12A5/KCC2             |
| SLC17A8 | Solute carrier family 17 member 8 /vesicular glutamate transporter 3                    | VGLUT3                   |
| SLC32A1 | Solute carrier family 32 member 1/ GABA vesicular transporter                           | VGAT                     |
| SLC37A1 | Glucose-6-phosphate exchanger/ Solute carrier family 37 member 1                        | G3PP                     |
| SLC5A11 | Sodium/myo-inositol cotransporter 2/Solute carrier family 5 member 11                   | SMIT2                    |
| SNAP25  | Synaptosomal-associated protein 25kDa                                                   | SNAP25                   |
| SV2C    | Synaptic vesicle glycoprotein 2C                                                        | SV2C                     |
| SYN1    | Synapsin I                                                                              | SYN1                     |
| SYNGR2  | Synaptogyrin 2                                                                          | SYNGR2                   |
| SYNJ2   | Synaptojanin 2                                                                          | SYNJ2                    |
| SYNPO   | Synaptopodin                                                                            | SYNPO                    |
| SYP     | Synaptophysin                                                                           | SYP                      |
| SYT12   | Synaptotagmin XII                                                                       | SytXII                   |
| SYT2    | Synaptotagmin II                                                                        | SytII                    |
| SYT5    | Synaptotagmin V                                                                         | SytV                     |
| SYT6    | synaptotagmin VI                                                                        | SytVI                    |
| TACR1   | Tachykinin receptor 1/ Substance-P receptor                                             | SPR/NK-1R                |
| TACR2   | Tachykinin receptor 2/ Substance-K receptor/ Neurokinin A receptor                      | SKR/NK-2R                |
| VAMP2   | Vesicle-associated membrane protein 2/ Synaptobrevin 2                                  | SYB2/VAMP-2              |
| VAMP5   | Vesicle-associated membrane protein 5/ Myobrevin                                        | VAMP-5                   |



## Pluripotency at DIV 0

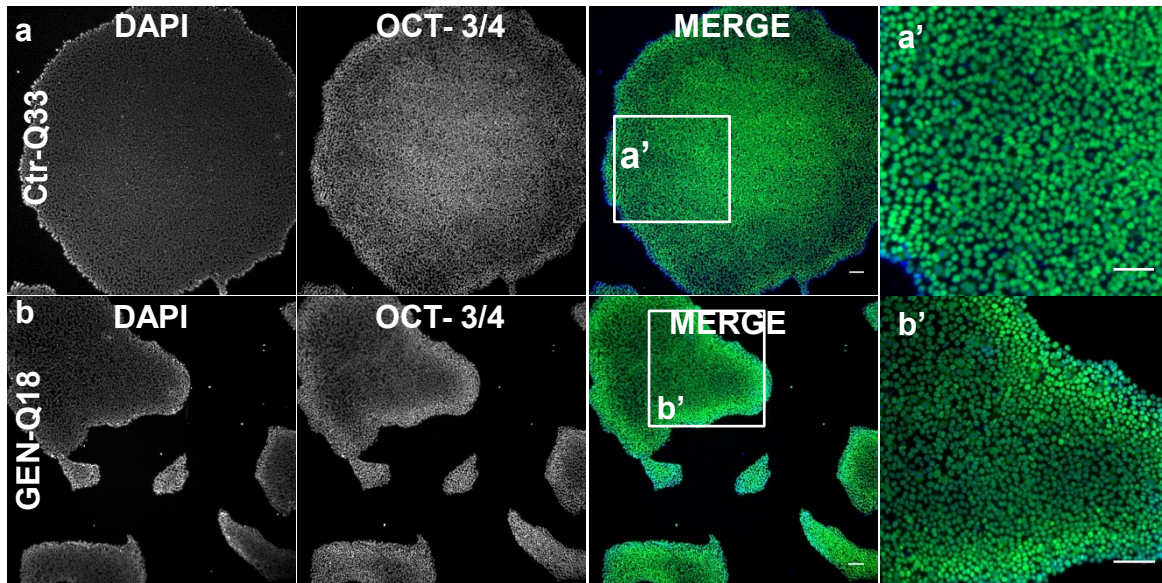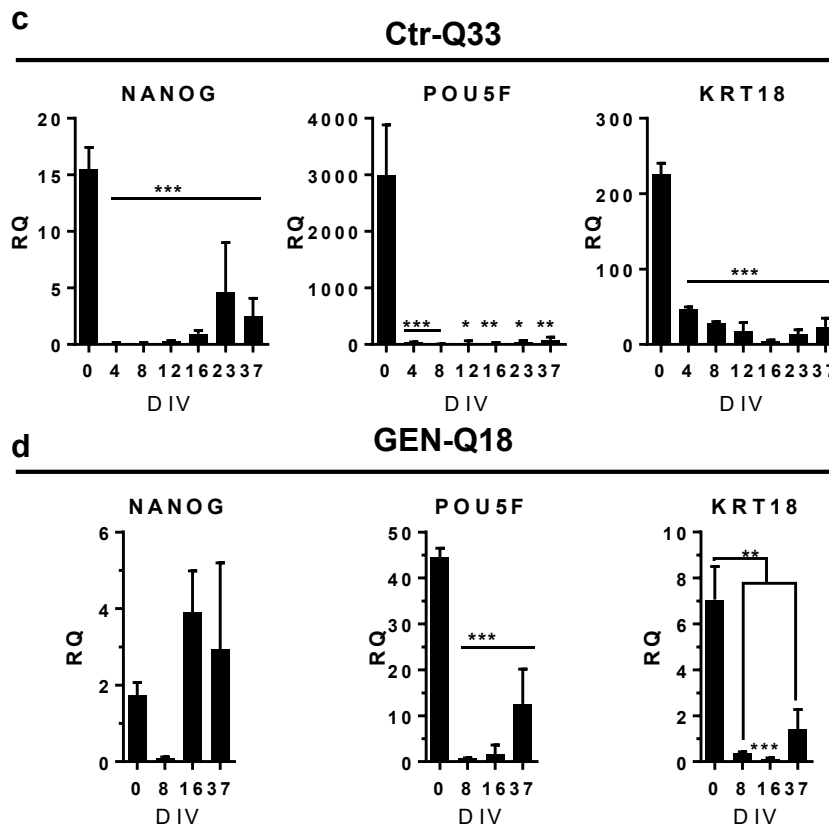

**Fig. S1** Representative OCT- 3/4 immuno-fluorescence in (a) Ctr-Q33 hiPSC and (b) GEN-Q18 hESC cultures at DIV 0. The square boxes (a' and b') show a detail of the images. Scale bar is 100  $\mu$ m. (c)-(d) Quantitative gene expression profiles of NANOG, POU5F1 and KRT18 mRNA levels along Ctr-Q33 (c) and GEN-Q18 (d) neuronal differentiation. Data is shown as mean  $\pm$  SEM. Statistics: One-way ANOVA followed by Tukey's multiple comparison test, relative to DIV 0. \*P < 0.05; \*\*P < 0.001; \*\*\*P < 0.0001.

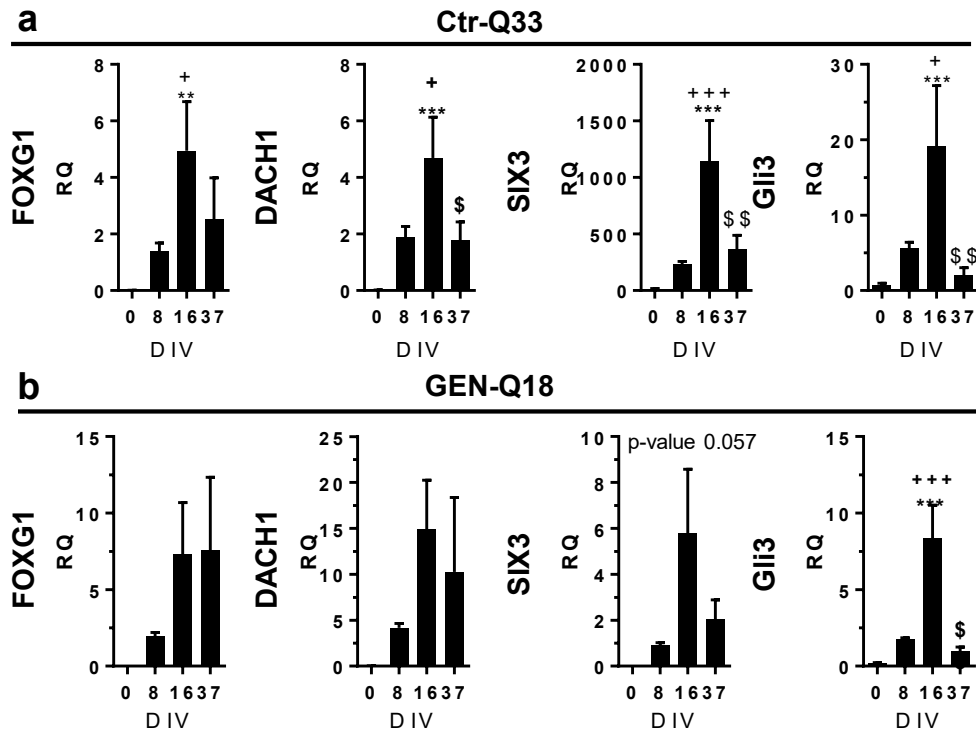

**Fig. S2** Quantitative gene expression profiles of anterior telencephalic genes FOXG1, DACH1, SIX3 and GLI3 throughout the neuronal differentiation of (a) Ctrl-Q33 and (b) GEN-Q18. Data is shown as mean  $\pm$  SEM; one-way ANOVA followed by Tukey's multiple comparison test, relative to DIV 0, for \*  $P < 0.05$ , \*\*  $P < 0.01$ , \*\*\*  $P < 0.001$ ; relative to DIV 8 for +  $P < 0.05$ , ++  $P < 0.01$ , +++  $P < 0.001$ ; and relative to DIV for is \$\$  $P < 0.01$ , \$\$\$  $P < 0.001$ .

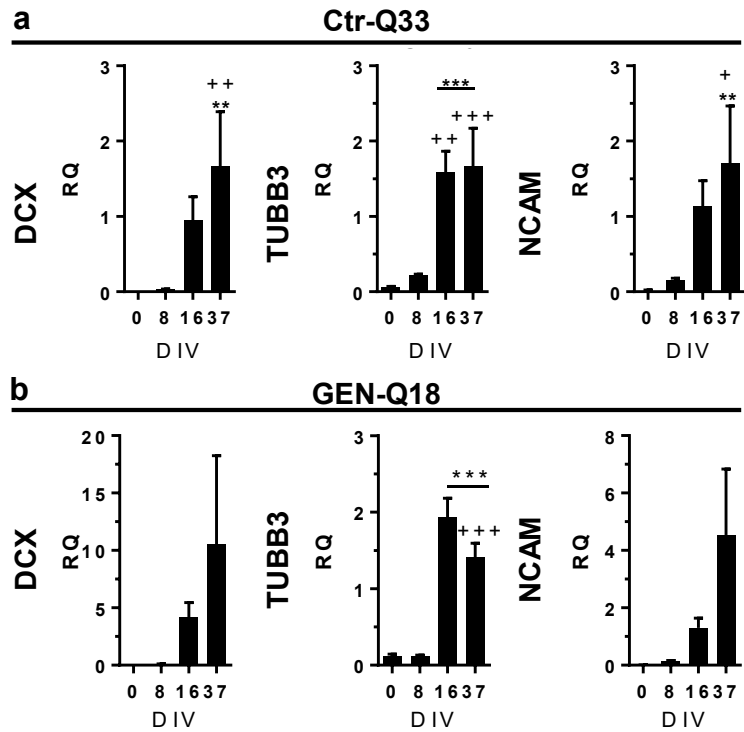

**Fig. S3** Quantitative expression profile of DCX, TUBB3 and NMCA1 along (a) Ctr-Q33 and (b) GEN-Q18 neuronal differentiation. Data is shown as mean  $\pm$  SEM; One-way ANOVA followed by Tukey's multiple comparison test, to DIV 0 for \*  $P < 0.05$ , \*\*  $P < 0.01$ , \*\*\* $P < 0.001$ , and to DIV 8 for +  $P < 0.05$ , ++  $P < 0.01$ , +++  $P < 0.001$ .

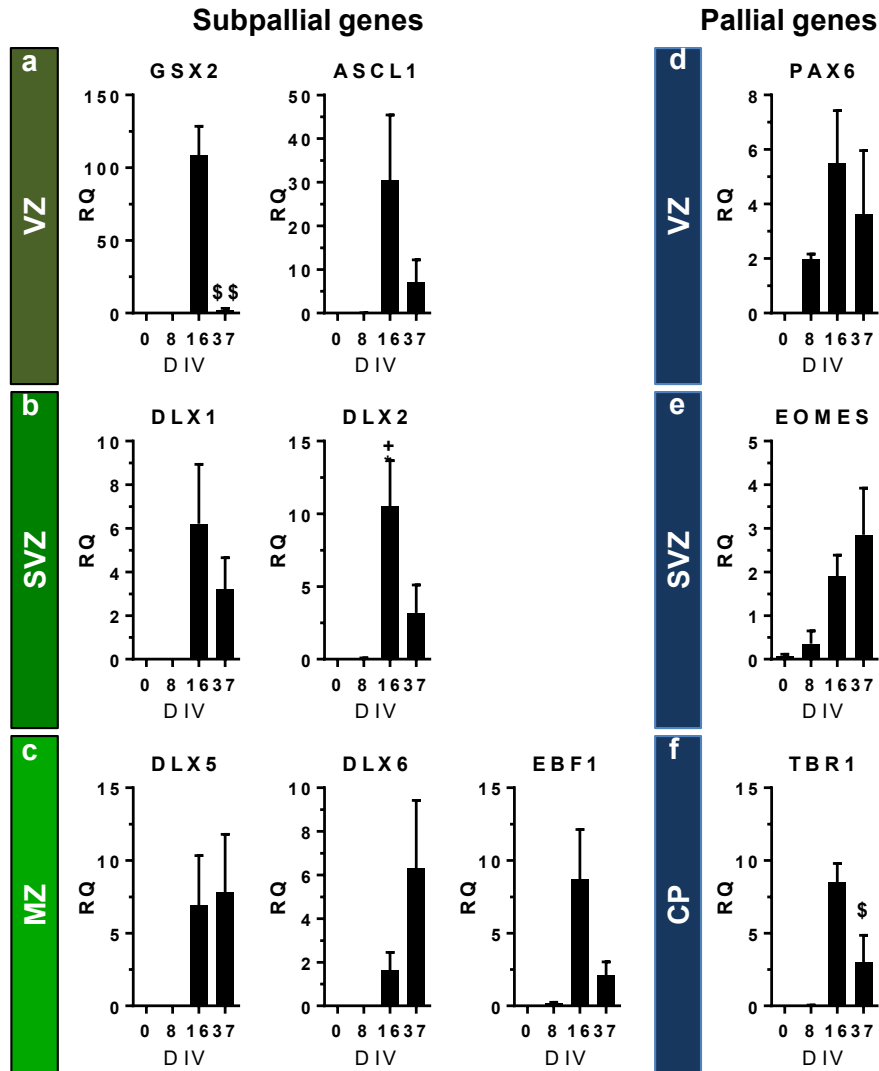

**Fig. S4** Anterior telencephalic genes expression by GEN-Q18 hESC derived cultures. Quantitative gene expression of subpallial (a-c) and pallial (d-f) gene expression throughout GEN-Q18 neuronal differentiation. Data is shown as mean  $\pm$  SEM; One-way ANOVA followed by Tukey's multiple comparison test, relative to DIV 0 for \*  $P < 0.05$ ; to DIV 8 for +  $P < 0.05$ ; and to DIV 16 for \$  $P < 0.05$ , \$\$  $P < 0.01$ . Abbreviations: VZ: Ventricular zone; SVZ: Subventricular zone; MZ: Mantel zone and CP: Cortical plate.

## GEN-Q18 hESC-derived neurons

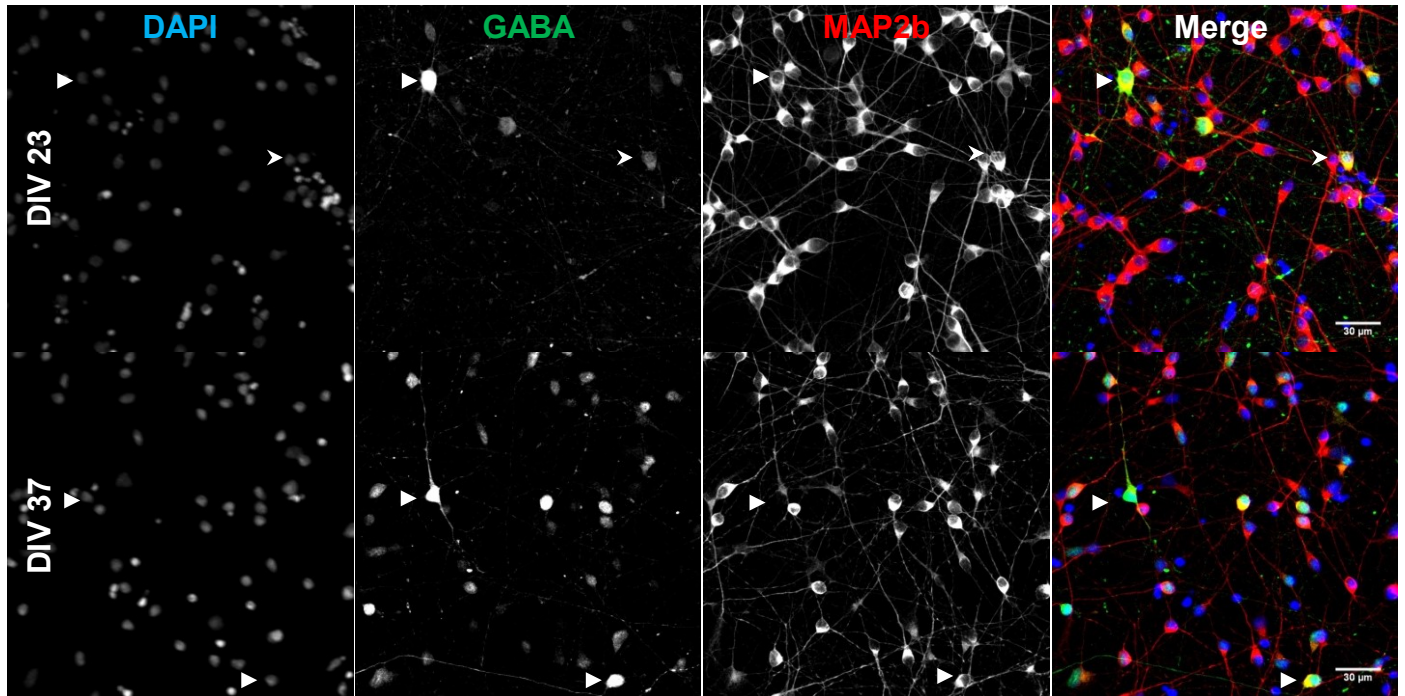

**Fig. S5** GEN-Q18 hiPSC- derived GABAergic neurons at DIV 23 (top) and DIV 37 (bottom). Images show representative GABA (green) immunofluorescence along with the neuronal MAP2b (red) and DAPI (blue) at both DIV. Triangular arrowheads highlight intense GABA<sup>+</sup> neurons; spiky arrowheads highlight low GABA<sup>+</sup> neurons. Scale bar is 30 μm.



## GEN-Q18 hESC-derived neurons

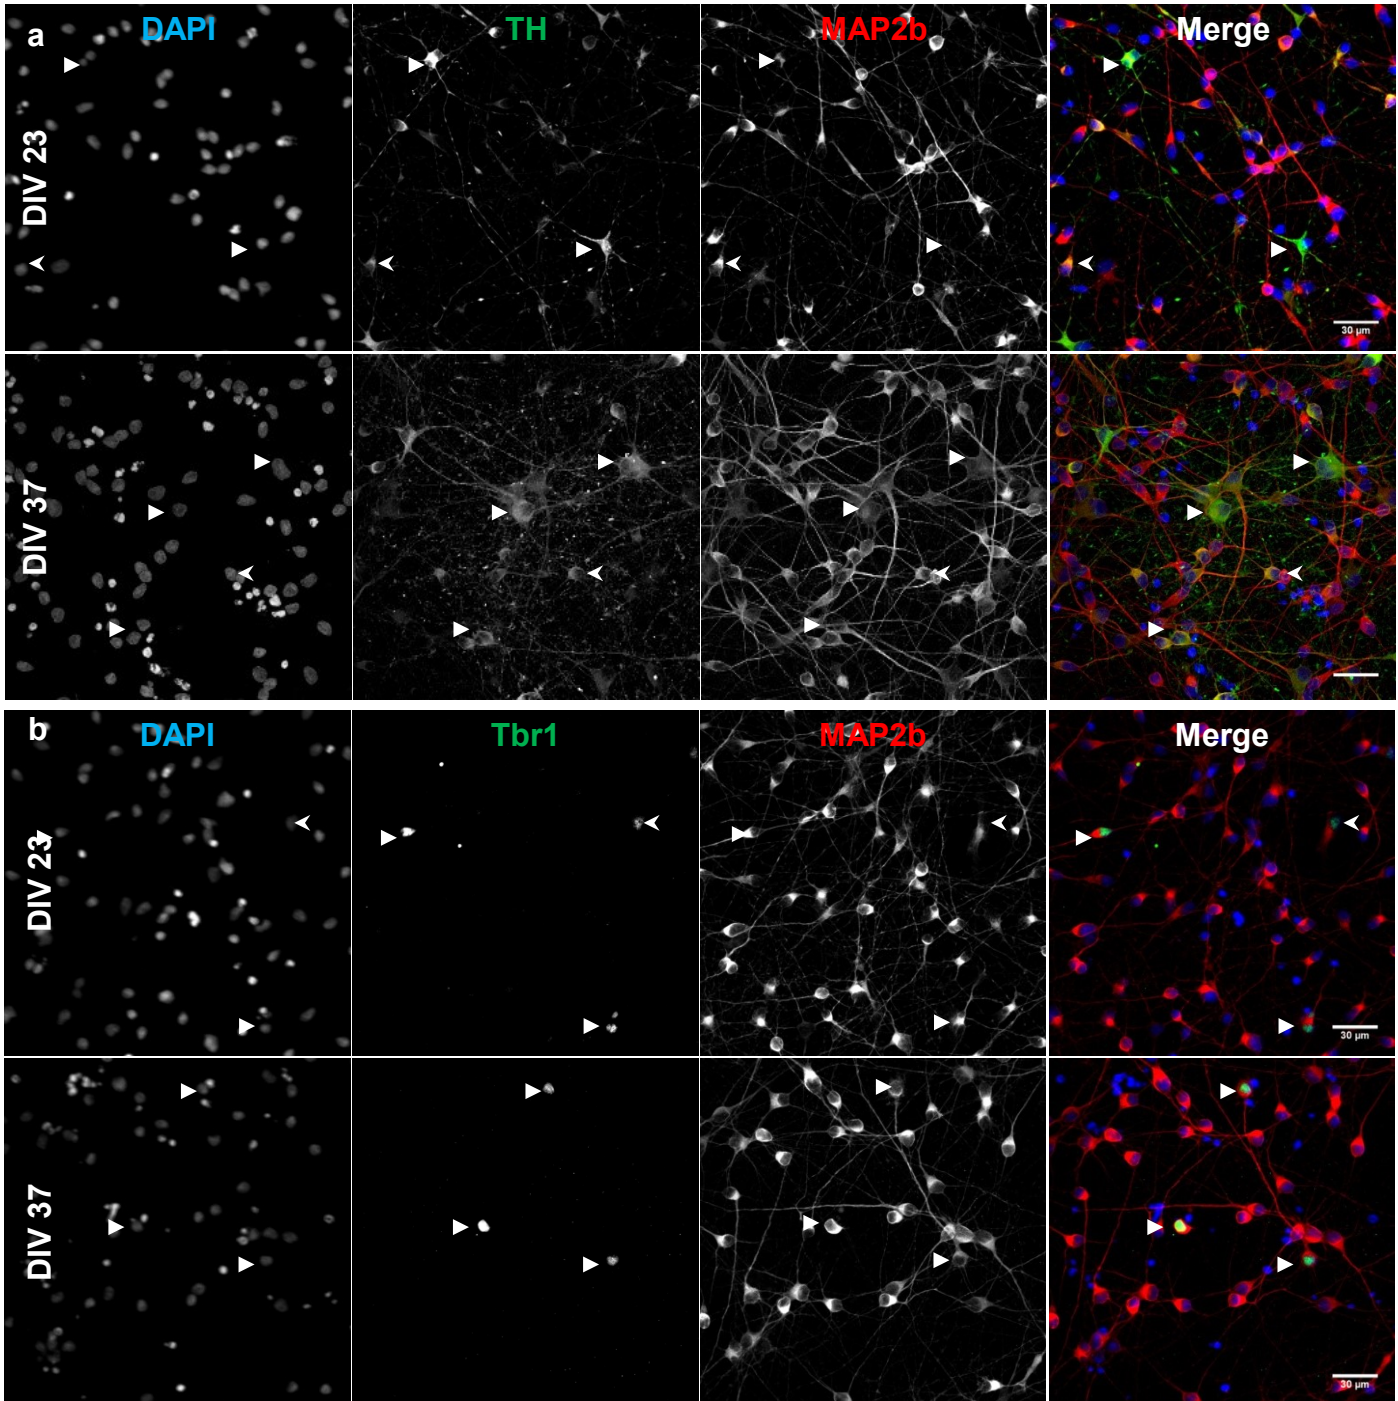

**Fig. S6** GEN-Q18 hiPSC- derived TH (a) and Tbr1-expressing neurons (b) at DIV 23 and DIV 37. Images show representative TH or Tbr1 (green) staining along with MAP2b (red) and DAPI (blue). Triangular arrowheads highlight intense stained-neurons; spiky arrowheads highlight low-stained neurons. Scale bar is 30  $\mu$ m.



### Ctr-Q33 iPSC-derived neurons

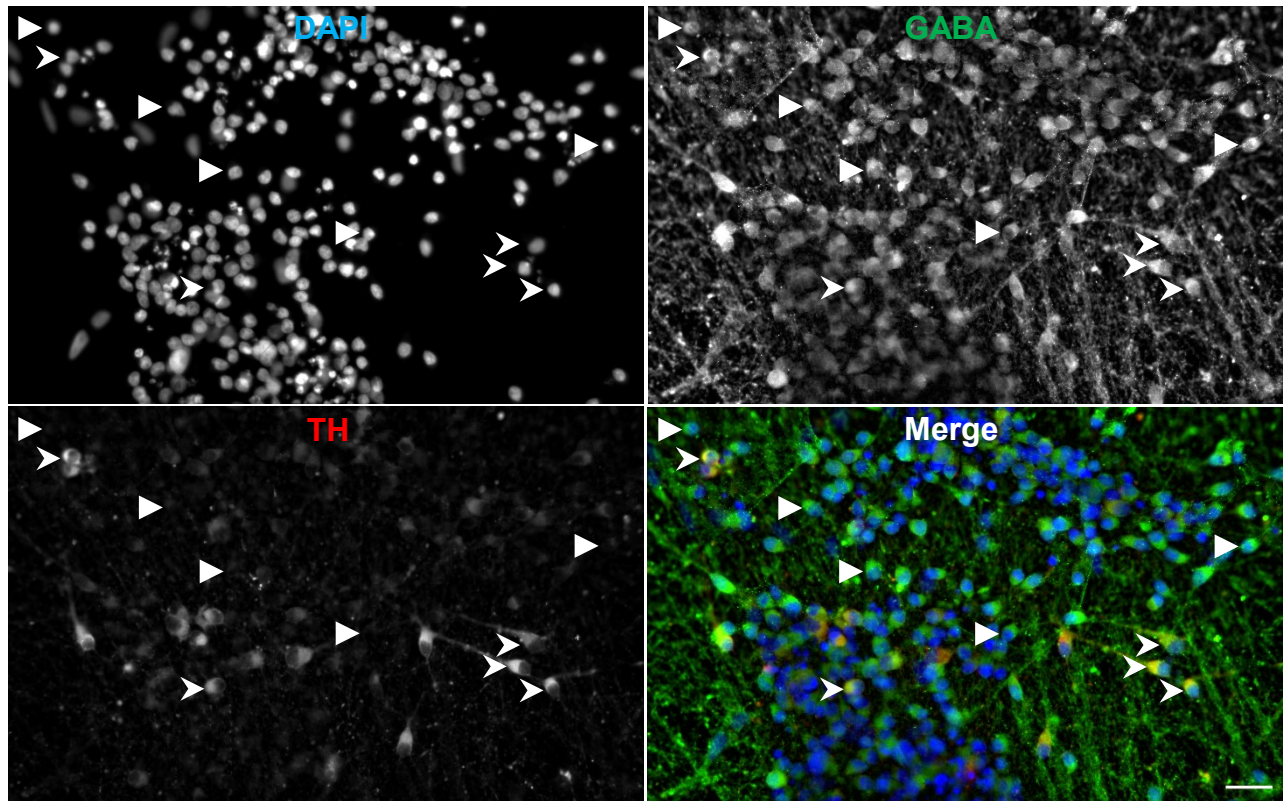

### GEN-Q18 hESC-derived neurons

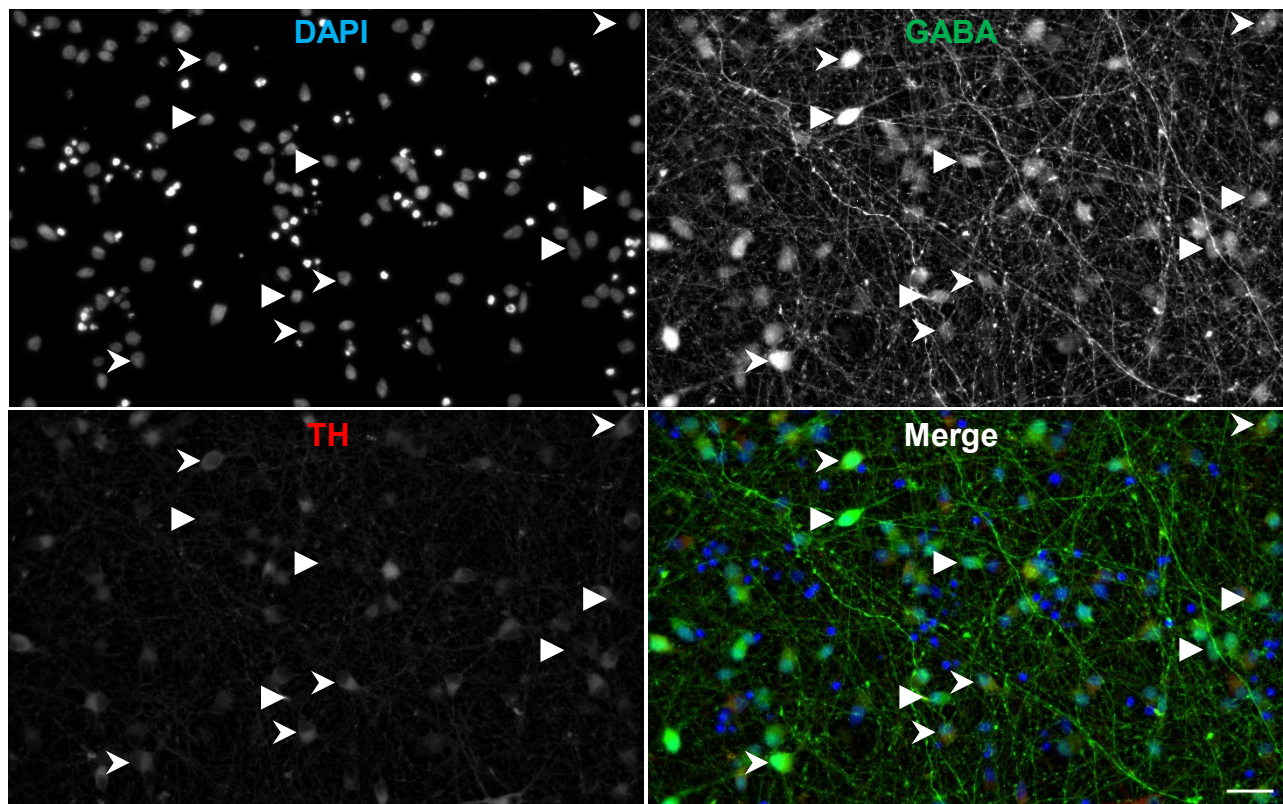

**Fig. S7.** Ctr-Q33 iPSC-derived (top) and GEN-Q18 hESC-derived (bottom) striatal GABAergic interneurons expressing TH at 37 DIV. Images show representative GABA (green) and TH (red) immunofluorescence with the nuclei stained with DAPI (blue). Triangular arrowheads indicate neurons expressing only GABA. Spiky arrowheads indicate neurons co-expressing GABA and TH. Scale bar is 30  $\mu$ m.

### GEN-Q18 hESC-derived neurons

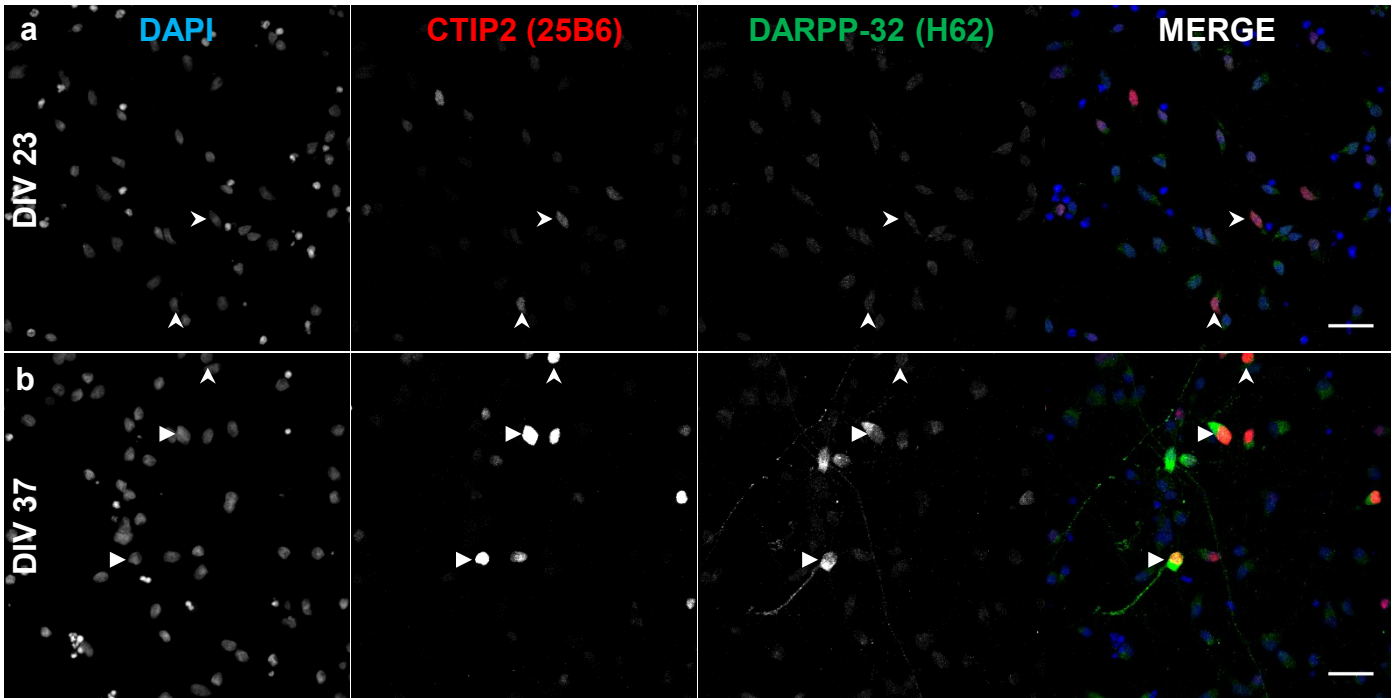

**Fig. S8** Representative images for DARPP-32 (green) and CTIP2 (red) by GEN-Q18 hESC-derived cultures at (a) DIV 23 and (b) DIV 37. Triangular arrowheads highlight double labelled neurons; spiky arrowheads highlight single labelled-Ctip2 nucleus. Scale bar is 30  $\mu$ m.



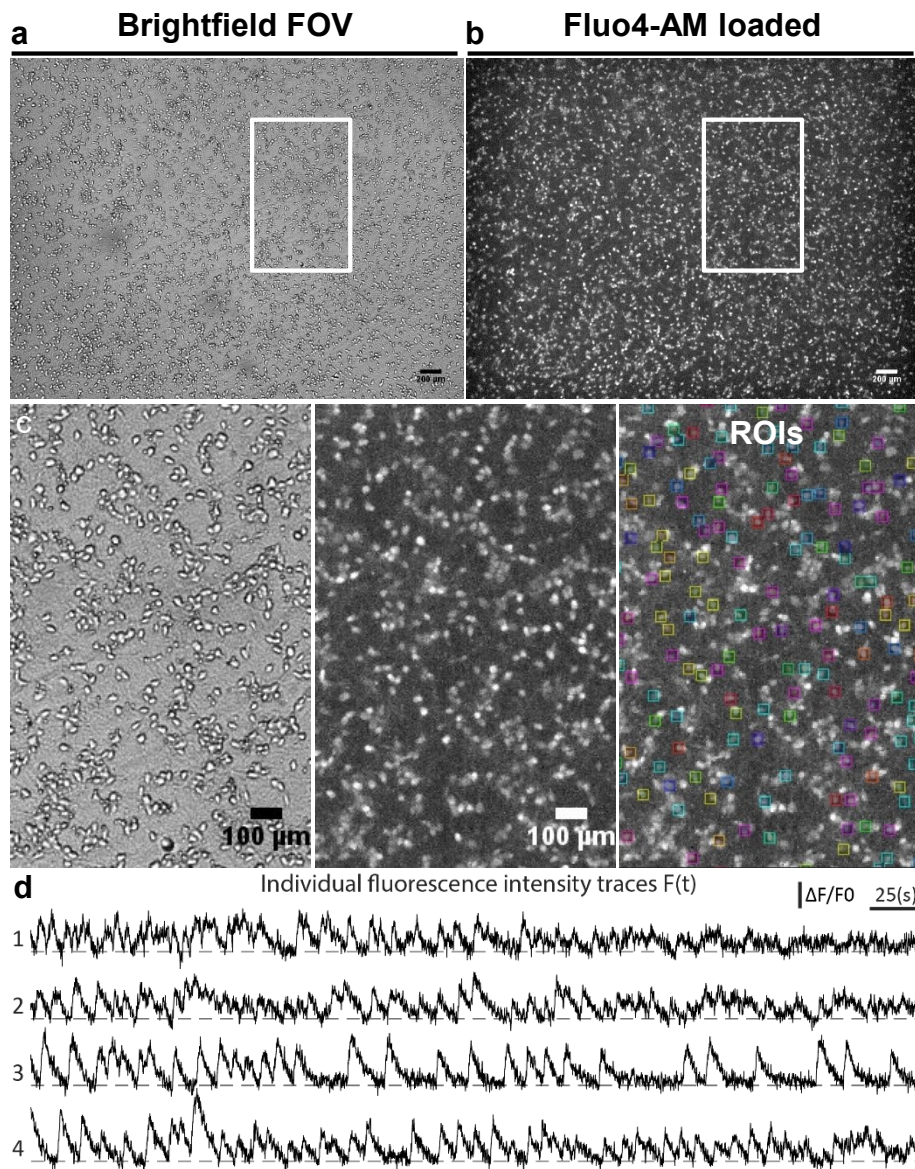

**Fig. S9** Calcium imaging and single-cell fluorescence traces. (a) Brightfield and (b) Fluor4-AM loaded fluorescence images of the recorded Field of View, and for a Ctr-Q33 culture at DIV 37. (c) Magnified square regions from (a-b) to show the ability to identify single cells and ascribe them as ROIs. (d) Examples of spontaneous activity fluorescence data for single neurons as a function of time. Fluorescence is expressed as  $F(t) = 100 (F^* - F_0) / F_0 \equiv \Delta F / F_0$  (%). The dashed line provides a reference for the signal baseline.

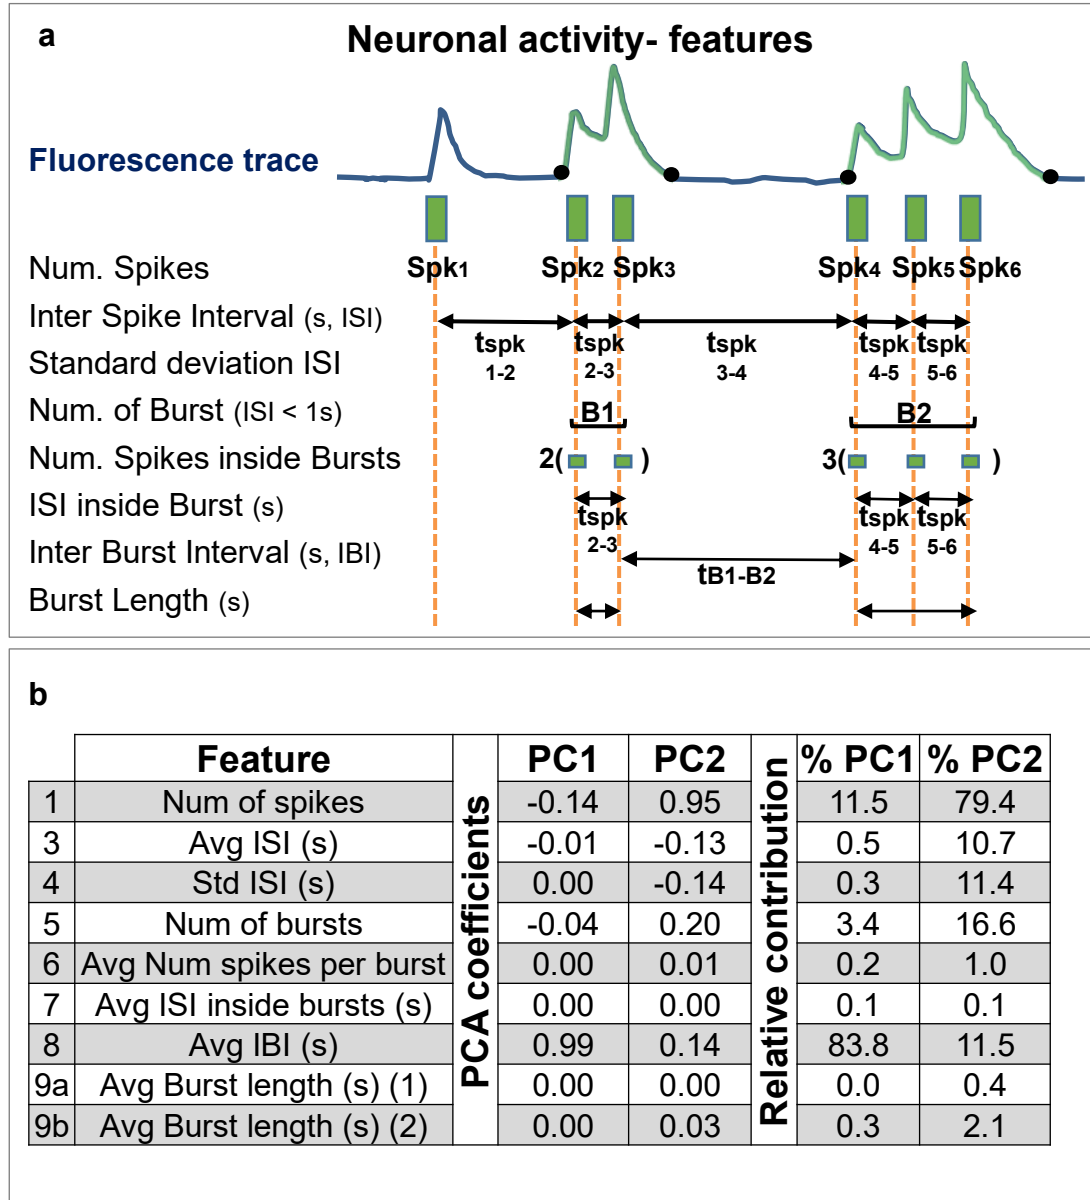

**Fig. S10** Set of neuronal firing features, extracted for each single neuron, and that describe the activity of the hiPSC-derived neurons. (a) The sketch illustrates the definition of each feature, and corresponds to a hand-drawn fluorescence trace with six spikes-like  $\text{Ca}^{2+}$  fluctuations represented as green boxes. Lines with arrowheads indicate intervals in seconds. Spk: spike; B: bursts; t: time. (b) Features contribution to PCA relative to each feature and first and second axis.

## Firing features

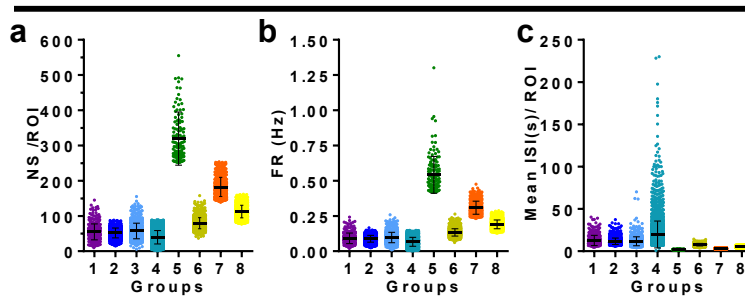

## Bursting features

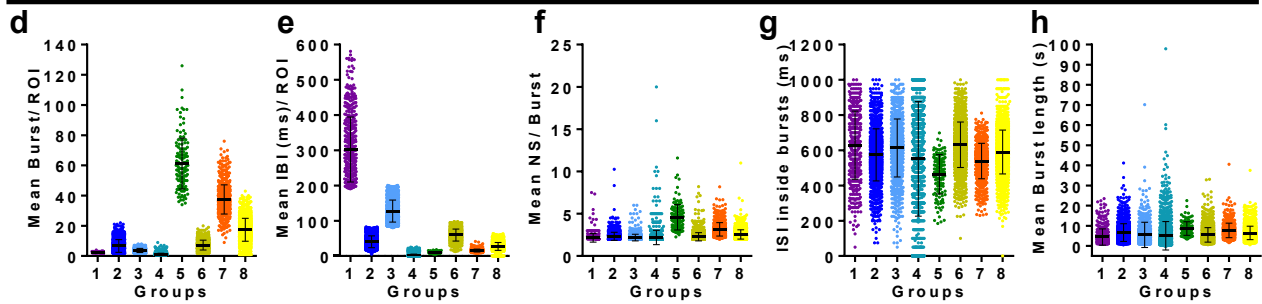

i

| Number Spikes |      |      |      |      |       |      |       |       | Mean Inter Burst Interval (IBI) (s) |       |      |       |     |      |      |      |      |
|---------------|------|------|------|------|-------|------|-------|-------|-------------------------------------|-------|------|-------|-----|------|------|------|------|
|               | G1   | G2   | G3   | G4   | G5    | G6   | G7    | G8    |                                     | G1    | G2   | G3    | G4  | G5   | G6   | G7   | G8   |
| Mean          | 54.8 | 51.9 | 57.5 | 39.6 | 319.6 | 79.5 | 182.4 | 112.6 | Mean                                | 302.4 | 40.6 | 127.4 | 1.3 | 10.1 | 59.5 | 15.5 | 27.2 |
| SD            | 22.7 | 14.0 | 22.2 | 19.0 | 75.2  | 15.9 | 27.2  | 17.9  | SD                                  | 92.0  | 16.8 | 31.2  | 4.2 | 2.5  | 16.9 | 4.2  | 11.1 |
| SEM           | 1.0  | 0.4  | 0.6  | 0.3  | 6.5   | 0.4  | 0.9   | 0.4   | SEM                                 | 4.2   | 0.4  | 0.9   | 0.1 | 0.2  | 0.4  | 0.1  | 0.3  |

  

| Mean Inter Spike Interval (ISI) (s) |      |      |      |      |     |     |     |     | Mean Spikes inside a Burst |     |     |     |     |     |     |     |     |
|-------------------------------------|------|------|------|------|-----|-----|-----|-----|----------------------------|-----|-----|-----|-----|-----|-----|-----|-----|
|                                     | G1   | G2   | G3   | G4   | G5  | G6  | G7  | G8  |                            | G1  | G2  | G3  | G4  | G5  | G6  | G7  | G8  |
| Mean                                | 12.7 | 11.7 | 11.7 | 19.8 | 1.9 | 7.6 | 3.3 | 5.3 | Mean                       | 2.1 | 2.3 | 2.2 | 2.2 | 4.6 | 2.3 | 3.1 | 2.5 |
| SD                                  | 6.0  | 3.8  | 5.3  | 15.9 | 0.3 | 1.5 | 0.5 | 0.8 | SD                         | 0.5 | 0.5 | 0.4 | 0.8 | 1.5 | 0.5 | 0.8 | 0.5 |
| SEM                                 | 0.3  | 0.1  | 0.2  | 0.3  | 0.0 | 0.0 | 0.0 | 0.0 | SEM                        | 0.0 | 0.0 | 0.0 | 0.0 | 0.1 | 0.0 | 0.0 | 0.0 |

  

| Firing Rate (Hz) |      |      |      |      |      |      |      |      | Mean ISI inside a Burst (ms) |       |       |       |       |       |       |       |       |
|------------------|------|------|------|------|------|------|------|------|------------------------------|-------|-------|-------|-------|-------|-------|-------|-------|
|                  | G1   | G2   | G3   | G4   | G5   | G6   | G7   | G8   |                              | G1    | G2    | G3    | G4    | G5    | G6    | G7    | G8    |
| Mean             | 0.09 | 0.09 | 0.10 | 0.07 | 0.54 | 0.13 | 0.31 | 0.19 | Mean                         | 628.9 | 574.0 | 612.9 | 636.0 | 464.3 | 631.4 | 539.1 | 590.2 |
| SD               | 0.04 | 0.02 | 0.04 | 0.03 | 0.13 | 0.03 | 0.05 | 0.03 | SD                           | 193.1 | 148.0 | 164.6 | 260.5 | 111.7 | 128.9 | 100.8 | 124.7 |
| SEM              | 0.00 | 0.00 | 0.00 | 0.00 | 0.01 | 0.00 | 0.00 | 0.00 | SEM                          | 8.9   | 3.9   | 4.8   | 6.2   | 9.7   | 3.2   | 3.5   | 2.8   |

  

| Number Burst |     |     |     |     |      |     |      |      | Burst length |     |     |     |     |     |     |     |     |
|--------------|-----|-----|-----|-----|------|-----|------|------|--------------|-----|-----|-----|-----|-----|-----|-----|-----|
|              | G1  | G2  | G3  | G4  | G5   | G6  | G7   | G8   |              | G1  | G2  | G3  | G4  | G5  | G6  | G7  | G8  |
| Mean         | 2.3 | 6.7 | 3.7 | 1.2 | 61.3 | 7.2 | 37.5 | 17.4 | Mean         | 4.4 | 6.6 | 5.5 | 5.0 | 8.6 | 5.5 | 7.7 | 6.5 |
| SD           | 0.5 | 4.2 | 1.3 | 0.7 | 16.8 | 3.3 | 9.7  | 7.9  | SD           | 4.0 | 4.4 | 6.2 | 7.1 | 3.4 | 3.6 | 3.6 | 3.4 |
| SEM          | 0.0 | 0.1 | 0.0 | 0.0 | 1.5  | 0.1 | 0.3  | 0.2  | SEM          | 0.2 | 0.1 | 0.2 | 0.2 | 0.3 | 0.1 | 0.1 | 0.1 |

**Fig. S11** Firing and bursting features of Ctr-Q33 hiPSC-derived neurons clustered in eight characteristic groups at DIV 37. The box plots show: (a) the number of spikes (NS); (b) the frequency (FR, Hz); (c) the Inter-spike-Interval (ISI, s); (d) the number of Bursts; (e) the Inter-Burst interval (IBI, ms); (f) the number of spikes inside a burst; (g) the ISI inside a burst (ms); and (f) the burst length (s). Groups are represented with different colors. The horizontal line within the boxplot shows the mean; the vertical lines show  $\pm$  SD. (i) Tables with the Mean, SD and SEM for each feature.

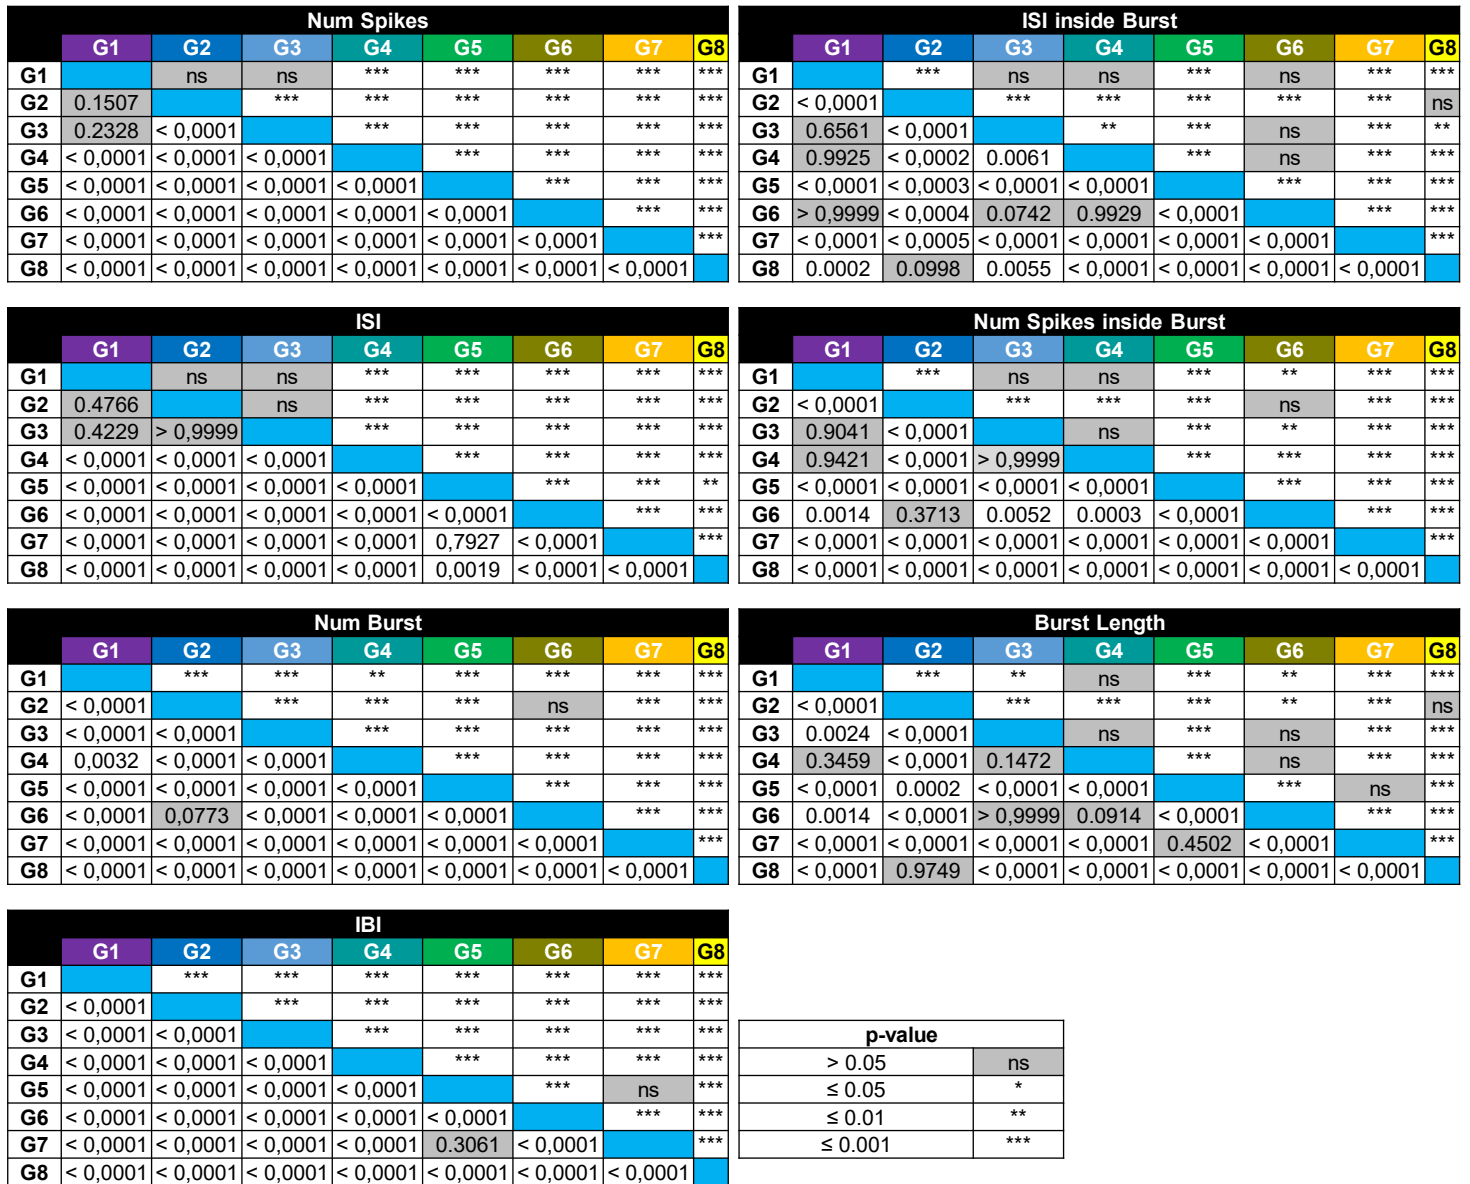

**Fig. S12** Statistic tables of firing and bursting features of the eight characteristic groups of Ctr-Q33 hiPSC-derived neurons clustered at DIV 37. Coloured matrices represent all possible comparisons on the diagonal (Blue box; Group on which the statistical test is done for all the multiple comparisons); One-ways ANOVA followed by Tukey's multiple comparison test; P < 0.05 \*, P ≤ 0.01 \*\* and P ≤ 0.001 \*\*\*. P > 0.05 (Grey boxes).

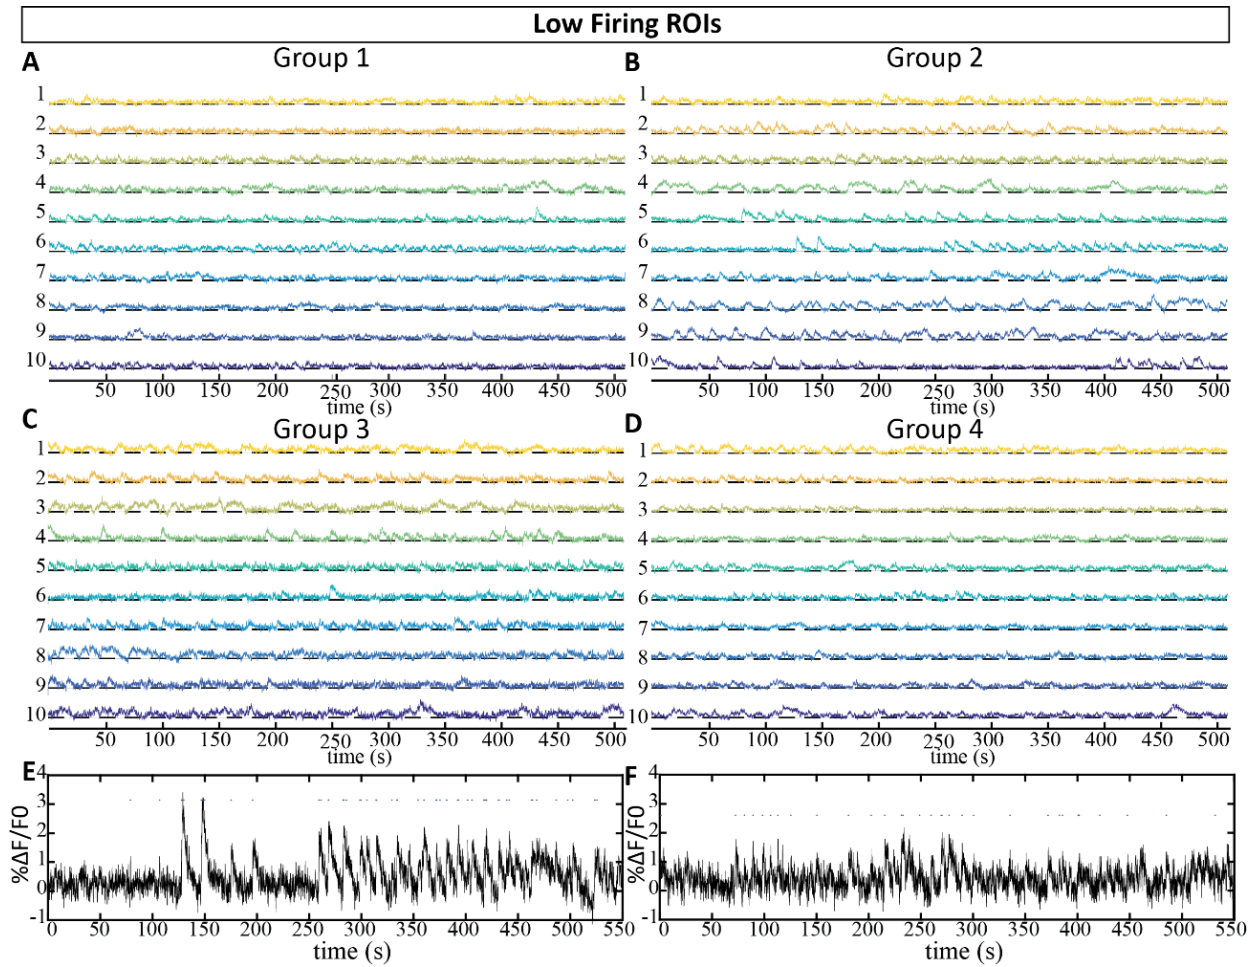

**Fig. S13.** Illustrative Ctr-Q33 hiPSC-derived neurons classified as ‘low firing neurons’ (LFN) at DIV 37. (a) Representative individual fluorescence traces from group G1 to G4 (a to d). All traces are equally normalized along time. (e) Magnified fluorescence trace of neuron 6 from group G2. (f) Equivalent magnification of neuron 5 from group G4. In general, neurons in these groups elicit single-spikes and short-lasting bursts. Inferred spikes in panels (e)-(f) are represented with the upper blue-dots. All fluorescence traces are normalized as  $\Delta F / F_0$ .



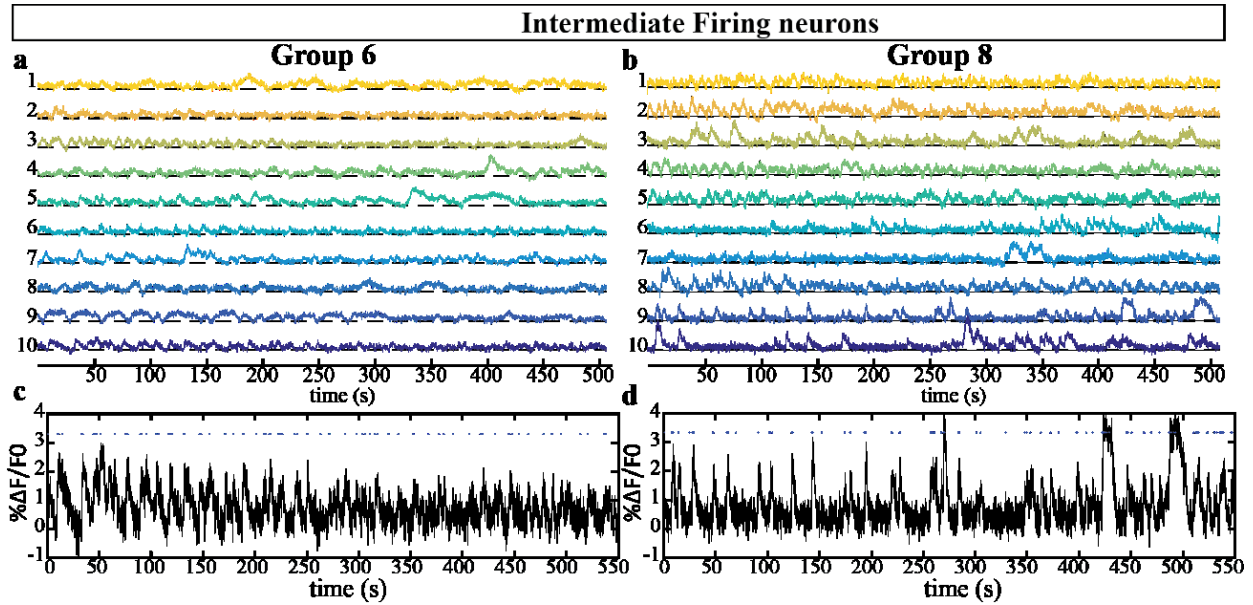

**Fig. S14** Illustrative Ctr-Q33 hiPSC-derived neurons classified as ‘intermediate firing neurons’ (IFN) at DIV 37. (a)-(b) Representative individual fluorescence traces from group G6 and G8. (c) Magnified fluorescence trace of neuron 10 from group G6. (d) Equivalent magnification of neuron 9 from group G8. Inferred spikes are represented with the upper blue-dots. All fluorescence traces are normalized as  $\Delta F / F_0$ .

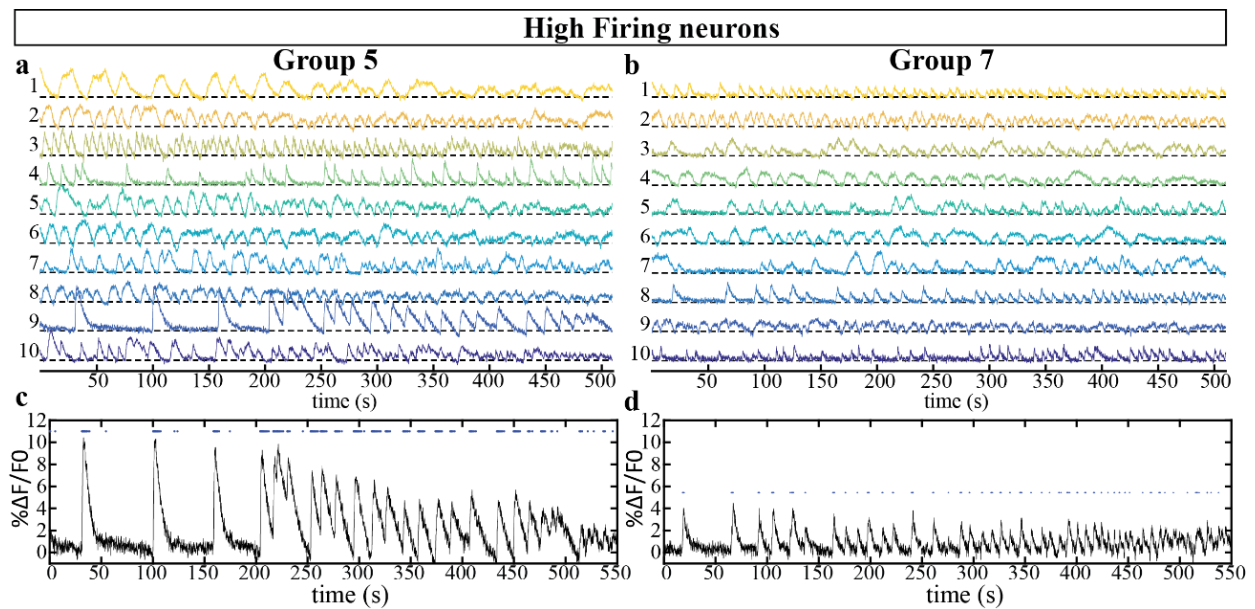

**Fig. S15** Illustrative Ctr-Q33 hiPSC-derived neurons classified as 'high firing neurons' (HFN) at DIV 37. (a)-(b) Representative individual fluorescence traces from group G5 and G7. (c) Magnified fluorescence trace of neuron 9 from group G5. (d) Equivalent magnification of neuron 8 from group G7. Both neurons exhibit a large number and long-lasting bursts. Inferred spikes are represented with the upper blue-dots. All fluorescence traces are normalized as  $\Delta F / F_0$ .

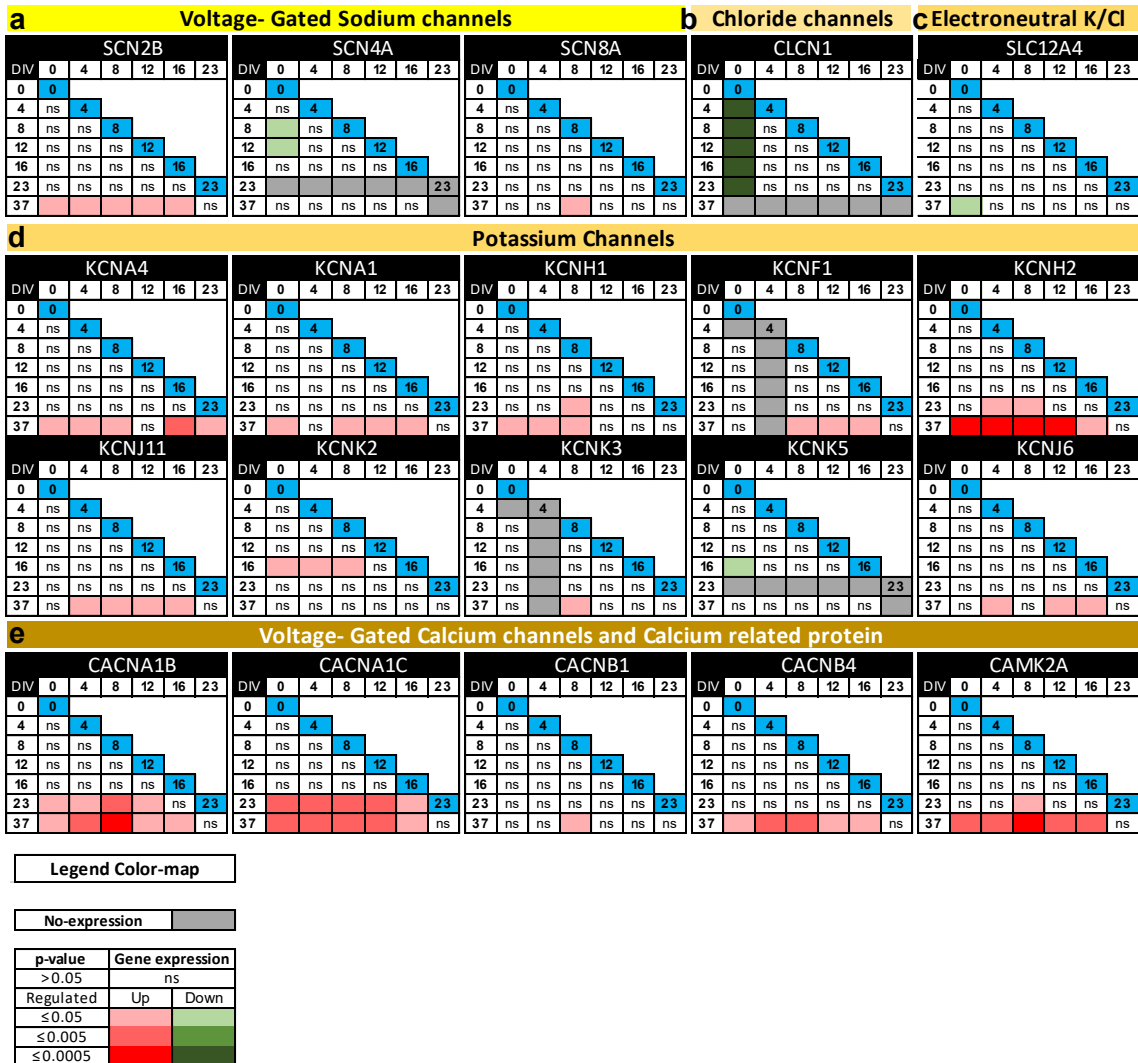

**Fig. S16** Expression of Voltage-Gated ion channels by Ctr-Q33 hiPSC along the neuronal differentiation. Quantitative gene expression of (a) VGNC (b) VGCC (c) the K/Cl co-transporter, (d) VGKC and (e) VGCC by Ctr-Q33 hiPSC along the differentiation. Represented in colour-matrices, the gene expression comparison for each DIV. One-way ANOVA followed by Tukey's multiple comparison test was performed between DIV (0 to 37). Colored matrices represent all possible comparisons on the diagonal (Blue box; DIV on which the statistical test is done for all the multiple comparisons); Non-expressing genes are represented as grey boxes. Color-boxes are expressing genes with  $p < 0.05$ . Up-regulated and down-regulated genes are represented by red and green respectively with increasing three color-scale intensities for  $P \leq 0.5$ ,  $P \leq 0.005$  and  $P \leq 0.0005$  respectively.



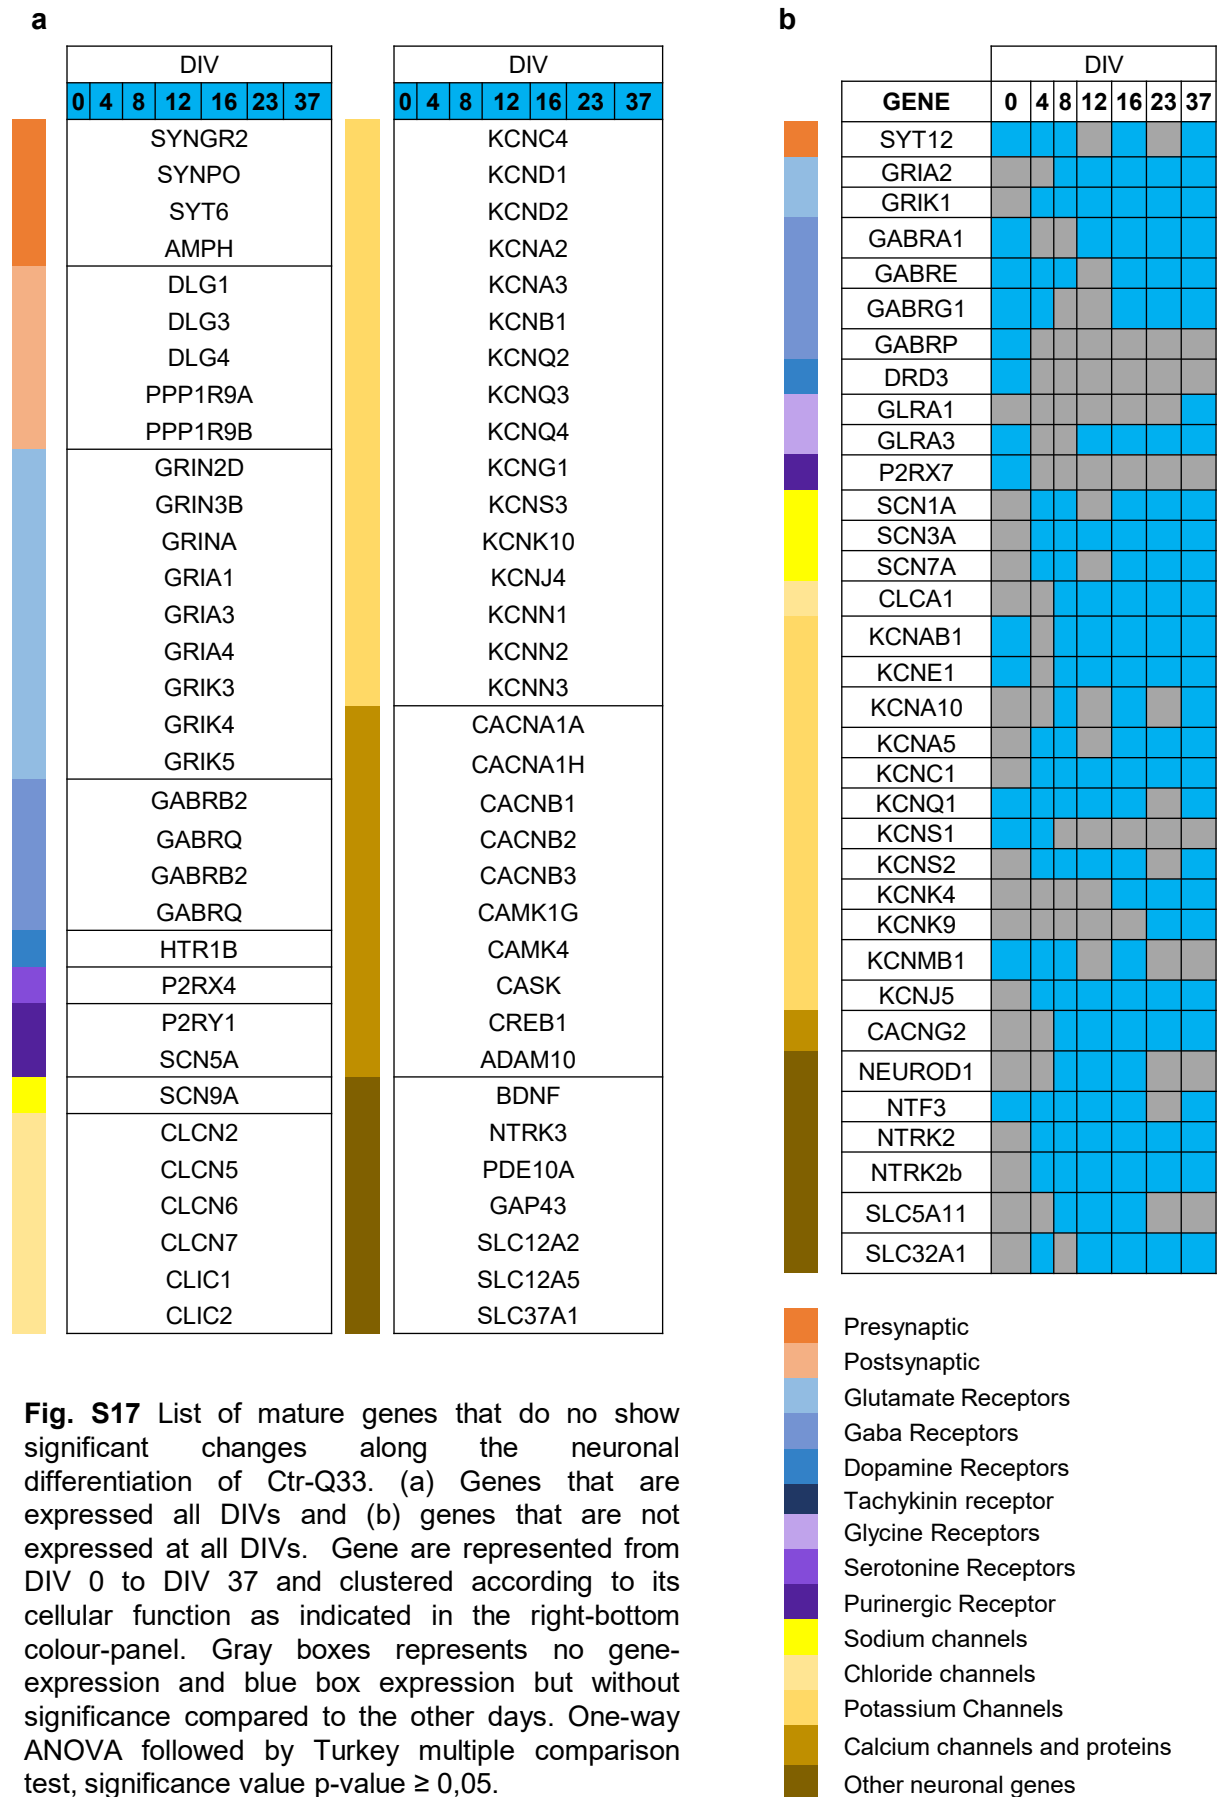

**Fig. S17** List of mature genes that do not show significant changes along the neuronal differentiation of Ctr-Q33. (a) Genes that are expressed all DIVs and (b) genes that are not expressed at all DIVs. Genes are represented from DIV 0 to DIV 37 and clustered according to their cellular function as indicated in the right-bottom color-panel. Gray boxes represent no gene-expression and blue boxes represent expression but without significance compared to the other days. One-way ANOVA followed by Turkey multiple comparison test, significance value  $p\text{-value} \geq 0,05$ .

| Protocol                         | hSC                  | Components                                                                                                       | DIV     | TUJ       | MAP2  | GABA            | DARPP3<br>2     | CTIP2           |
|----------------------------------|----------------------|------------------------------------------------------------------------------------------------------------------|---------|-----------|-------|-----------------|-----------------|-----------------|
| Aubry et al. 2008                | PSC                  | Feeder MS5 cells (Day 0-21/23). MO-GO: BDNF, SHH, DKK-1, dbcAMP and VPA                                          | 62 days | About 30% | 22,2% | 36%* (7,8%+)    | 53%* (11,8%+)   | -               |
| The HD iPSC Consortium (2012)    | iPSC                 | Feeder layer+ FGF2 (Aggregated to generate NPC). MO-GO: BDNF, rhSHH, DKK-1, dbcAMP, VPA                          | 86 days | -         | 10%   | -               | 5%* (0,5%+)     | -               |
| Delli Carri et al 2012           | iPSC ESC             | MO-GO: Dorsomorphin, Noggin, SB431542, SHHC-25II and DKK-1 (Day 0-15); B27 and BDNF (Day 15-onwards)             | 80 days | -         | 51%   | 78,4%* (40%+)   | 20%* (10,2%+)   | 60,3%* (30,7%+) |
| Ma et al 2013                    | ESC                  | MO: SHH and RA. Day 26-47; MO-GO-NT-O: BDNF, GDNF, IGF, AA and cAMP                                              | 47 days | 43,2%     | -     | 90,2%# (40%+)   | 89,7%# (38,7%+) | -               |
| Victor et al. 2014               | Postnatal fibroblast | miR-9/9*-124; miR-BCL11, DLX1/2, MYT1L                                                                           | 35 days | 87%       | 90%   | 90%* (81%+)     | 70%* (63%+)     | -               |
| Telezhkin et al 2015 + This work | iPSC                 | Day 0-16; MO: SB, LDN, IWR1. Day 16-37; MO-GO-NT-O: PD, DAPT, CH, B27-RA, AA GABA, FK, BDNF and Ca <sup>2+</sup> | 37 days | -         | 94,5% | 29,8%* (28,1%+) | 6,3%* (5,9%+)   | 54,8* (51,8%+)  |
|                                  | ESC                  |                                                                                                                  |         | -         | 98,3% | 46,6* (45,8%+)  | 4,2%* (4,1%+)   | 42,7 (41,9%+)   |
| Lin et al. 2015                  | NPC                  | MO-GF: BDNF, SHH, DKK-1, Y-27632                                                                                 | 60 days | -         | 63%   | 96%* (60,5%+)   | 21%* (13,2%+)   | -               |
|                                  | iPSC-derived NPC     |                                                                                                                  |         | -         | 69%   | 96,5* (66,2%+)  | 86%* (60%+)     | -               |
| Arber et al. 2015                | iPSC ESC             | Day 0-5/9; MO: SB, LDN. Day 9-22; MO: Activine (Act). Day 25-36; MO: Act, GDNF, BDNF                             | 43 days | -         | -     | -               | 20-50%          | 10-80%          |

**Fig. S18** List of MSNs differentiation protocols from hSC. Relative to # BIII-Tubulin, to \* MAP2 and to + Dapi. Abbreviations: TUJ:  $\beta$ III-Tubulin, MO: morphogen, GO: Growth Factors, NT: Neurotransmitter.

**a**

| Cell line   | Methods           | Time of analysis |          |     | Total |
|-------------|-------------------|------------------|----------|-----|-------|
|             |                   | 1 month          | 3 months |     |       |
| Ctr-Q33-GFP | Tissue processing | IHC              | IHC      | TEM | 17    |
|             | Number of mice    | 6                | 8        | 3   |       |

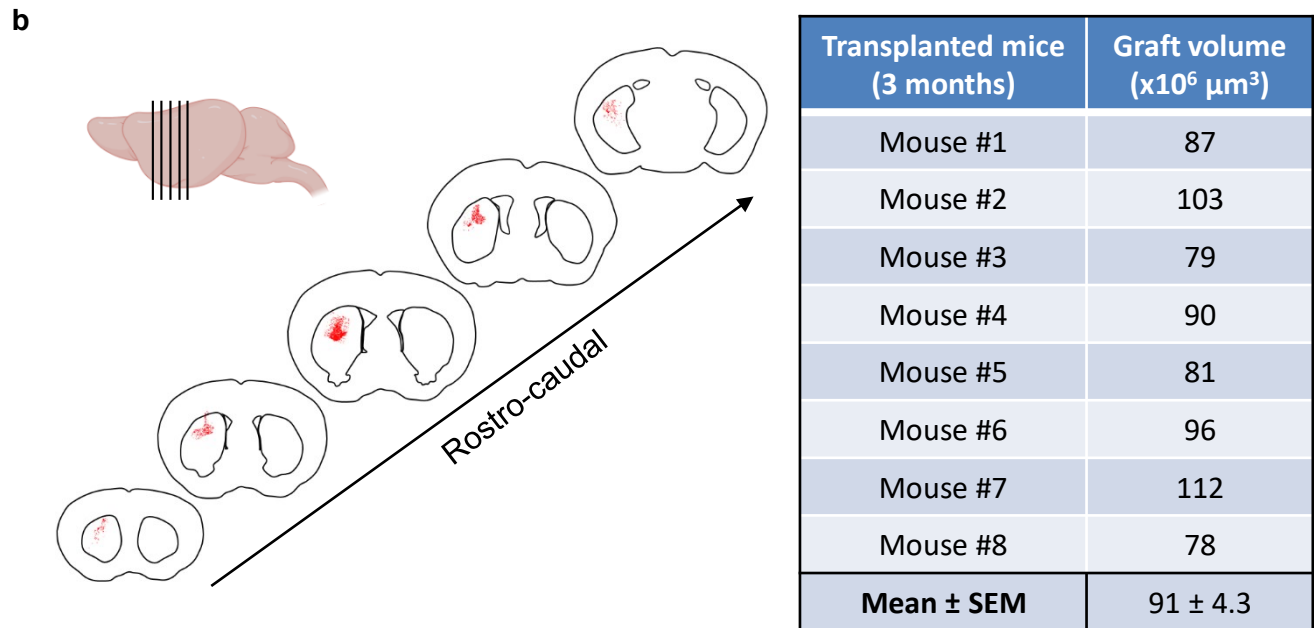

**c**

| Cell marker     | Time of analysis | Total number of cells (Mean $\pm$ SEM) |
|-----------------|------------------|----------------------------------------|
| <b>MAP2</b>     | 1 month          | 3188.7 $\pm$ 153.6                     |
|                 | 3 months         | 3754.7 $\pm$ 690.0                     |
| <b>CTIP2</b>    | 1 month          | 3462.0 $\pm$ 158.1                     |
|                 | 3 months         | 3754.7 $\pm$ 690.0                     |
| <b>DARPP-32</b> | 1 month          | 266.1 $\pm$ 49.4                       |
|                 | 3 months         | 230.5 $\pm$ 76.9                       |
| <b>HNA</b>      | 1 month          | 3948.0 $\pm$ 194.7                     |
|                 | 3 months         | 4394.0 $\pm$ 705.9                     |

**Fig. S19** Assessment of graft size and neuronal fate in cell transplantation experiments. (a) Table indicating the number of transplanted mice employed for immunohistochemical (IHC) or transmission electron microscopy (TEM) analysis at 1 and 3 months PST. (b) Representative schema of rostro-caudal spreading of transplanted cells and quantification of graft volume at 3 months PST ( $n=8$ ). (c) Quantification of the number of grafted human cells (HNA<sup>+</sup>) expressing the neuronal marker MAP2 and the striatal neuronal markers CTIP2 and DARPP-32 at 1 and 3 months PST ( $n=6$ ).

3 months PST

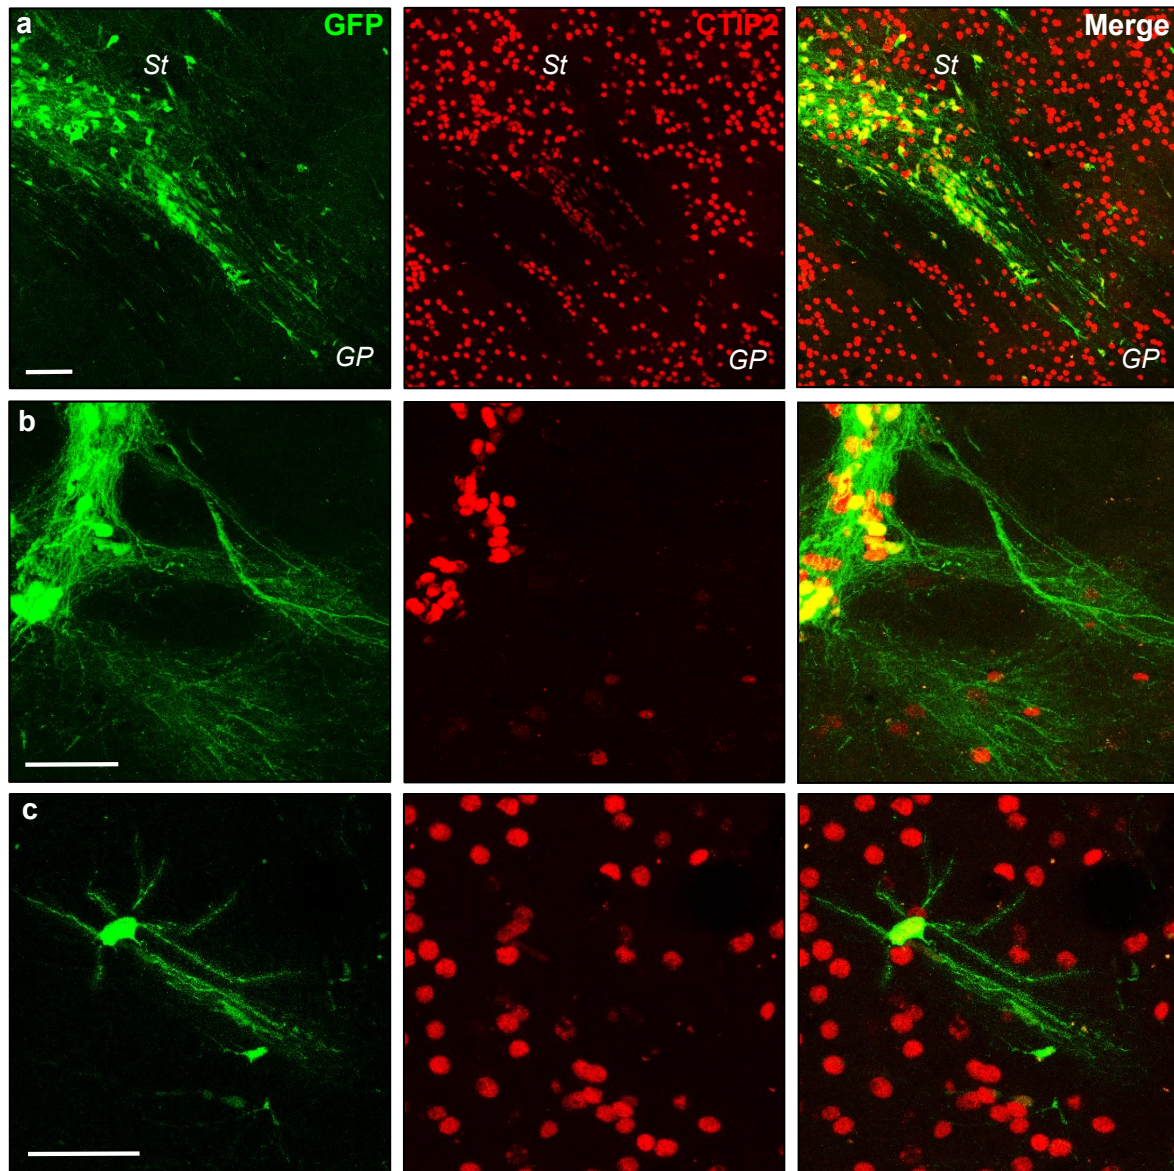

**Fig. S20** (refers to Fig. 16, showing the three color channels independently). Transplanted hNPC-derived neurons project towards MSN targets. Sagittal sections of the mouse striatum showing CTIP2<sup>+</sup> human cells extending GFP<sup>+</sup> projections towards the external globus pallidus area. *St*, Striatum; *GP*, Globus pallidus. Scale bars: 50  $\mu$ m
